# Supplementary material for: The Skeleton Forming Proteome of an Early Branching Metazoan: A Molecular Survey of the Biomineralization Components Employed by the Coralline Sponge Vaceletia Sp
Source: PLoS One. 2015 Nov 4;10(11):e0140100. doi: 10.1371/journal.pone.0140100 (PMC4633127; doi:10.1371/journal.pone.0140100)
Supplement: S3 File — (XLS) [file pone.0140100.s003.xls]

## Sheet: proteinGroups
Protein IDs	Majority protein IDs	Peptide counts (all)	Peptide counts (razor+unique)	Peptide counts (unique)	Fasta headers	Number of proteins	Peptides	Razor + unique peptides	Unique peptides	Sequence coverage [%]	Unique + razor sequence coverage [%]	Unique sequence coverage [%]	Mol. weight [kDa]	Sequence length	Sequence lengths	PEP	Intensity	iBAQ	iBAQ devided by Sum iBAQ	Percent of total	Hydroxyproline site IDs	Oxidation (M) site IDs	Phospho (STY) site IDs	Hydroxyproline site positions	Oxidation (M) site positions	Phospho (STY) site positions
>c100960_g1_i1_4	>c100960_g1_i1_4	1	1	1	>c100960_g1_i1_4	1	1	1	1	15.3	15.3	15.3	7.9267	72	72	0.0012824	76884000	15377000	0.00101192	0.101192
>c102013_g1_i1_4	>c102013_g1_i1_4	1	1	1	>c102013_g1_i1_4	1	1	1	1	24.2	24.2	24.2	10.299	91	91	1.0803e-15	15275000	3055100	0.000201049	0.0201049
>c102844_g1_i1_3	>c102844_g1_i1_3	1	1	1	>c102844_g1_i1_3	1	1	1	1	14.7	14.7	14.7	7.238	68	68	1.1371e-26	589900000	117980000	0.00776398	0.776398
>c103713_g1_i1_5	>c103713_g1_i1_5	1	1	1	>c103713_g1_i1_5	1	1	1	1	10.4	10.4	10.4	15.35	134	134	1.893e-13	0	0	0	0
>c103979_g1_i1_6;>c39900_g1_i1_1;>c39900_g1_i2_2;>c39900_g1_i3_1	>c103979_g1_i1_6	4;1;1;1	4;1;1;1	3;0;0;0	>c103979_g1_i1_6	4	4	4	3	37.1	37.1	23.4	13.847	124	124;518;700;720	7.4939e-24	125090000	17870000	0.00117598	0.117598
>c14026_g1_i1_3	>c14026_g1_i1_3	7	2	2	>c14026_g1_i1_3	1	7	2	2	55.5	25.4	25.4	23.528	209	209	3.0161e-262	479870000	47987000	0.00315791	0.315791		1;2			78;152
>c18914_g1_i1_1;>c41117_g1_i1_6;>c69201_g1_i1_2	>c18914_g1_i1_1;>c41117_g1_i1_6;>c69201_g1_i1_2	2;2;1	2;2;1	2;2;1	>c18914_g1_i1_1;>c41117_g1_i1_6;>c69201_g1_i1_2	3	2	2	2	13	13	13	15.988	146	146;263;146	9.0212e-51	1797700000	179770000	0.0118302	1.18302
>c1963_g1_i2_2	>c1963_g1_i2_2	1	1	1	>c1963_g1_i2_2	1	1	1	1	17.7	17.7	17.7	10.671	96	96	7.5488e-18	247930000	61983000	0.00407895	0.407895		3;4;5			22;31;32
>c20021_g1_i1_2	>c20021_g1_i1_2	3	3	1	>c20021_g1_i1_2	1	3	3	1	25.7	25.7	16.6	19.211	175	175	2.8292e-109	5479700000	782810000	0.0515149	5.15149
>c20088_g1_i1_5	>c20088_g1_i1_5	1	1	1	>c20088_g1_i1_5	1	1	1	1	4.2	4.2	4.2	38.627	353	353	0.0015441	0	0	0	0		6			248
>c21396_g1_i1_4;>c13368_g1_i1_6	>c21396_g1_i1_4	3;1	3;1	3;1	>c21396_g1_i1_4	2	3	3	3	17.9	17.9	17.9	21.654	196	196;86	9.4914e-202	828490000	92054000	0.00605785	0.605785		7			41
>c22200_g1_i1_4	>c22200_g1_i1_4	1	1	1	>c22200_g1_i1_4	1	1	1	1	7.4	7.4	7.4	14.84	136	136	0.00065361	421350000	46817000	0.00308092	0.308092			0;19			3;4
>c26034_g1_i1_1	>c26034_g1_i1_1	1	1	1	>c26034_g1_i1_1	1	1	1	1	11.7	11.7	11.7	12.607	120	120	8.5626e-08	22701000	5675300	0.000373478	0.0373478
>c27354_g1_i1_6;>c34006_g1_i2_6;>c34006_g1_i1_6	>c27354_g1_i1_6;>c34006_g1_i2_6;>c34006_g1_i1_6	2;2;2	2;2;2	2;2;2	>c27354_g1_i1_6;>c34006_g1_i2_6;>c34006_g1_i1_6	3	2	2	2	13	13	13	17.302	154	154;209;228	2.2868e-11	719850000	119970000	0.00789494	0.789494
>c27518_g1_i1_4;>c95380_g1_i1_3;>c39900_g2_i3_4;>c39900_g2_i2_4;>c39900_g2_i1_4;>c39900_g2_i4_4	>c27518_g1_i1_4;>c95380_g1_i1_3;>c39900_g2_i3_4;>c39900_g2_i2_4;>c39900_g2_i1_4;>c39900_g2_i4_4	2;1;1;1;1;1	1;1;1;1;1;1	1;1;1;1;1;1	>c27518_g1_i1_4;>c95380_g1_i1_3;>c39900_g2_i3_4;>c39900_g2_i2_4;>c39900_g2_i1_4;>c39900_g2_i4_4	6	2	1	1	13.1	5.1	5.1	23.607	214	214;68;325;342;364;381	5.8478e-13	48686000	4868600	0.000320391	0.0320391		9			145
>c29357_g1_i1_2	>c29357_g1_i1_2	3	3	3	>c29357_g1_i1_2	1	3	3	3	10.1	10.1	10.1	22.363	207	207	1.1087e-39	2693600000	269360000	0.0177259	1.77259
>c29401_g1_i2_3;>c29401_g1_i1_2	>c29401_g1_i2_3;>c29401_g1_i1_2	1;1	1;1	1;1	>c29401_g1_i2_3;>c29401_g1_i1_2	2	1	1	1	4.5	4.5	4.5	24.103	223	223;229	7.1891e-06	37600000	2685700	0.00017674	0.017674	1;2		1	106;109		105
>c29680_g1_i2_1;>c29680_g1_i3_1;>c29680_g1_i1_1	>c29680_g1_i2_1;>c29680_g1_i3_1;>c29680_g1_i1_1	1;1;1	1;1;1	1;1;1	>c29680_g1_i2_1;>c29680_g1_i3_1;>c29680_g1_i1_1	3	1	1	1	3.9	3.9	3.9	36.788	337	337;435;489	8.0383e-06	96259000	8750800	0.000575869	0.0575869
>c31462_g1_i1_1	>c31462_g1_i1_1	2	2	2	>c31462_g1_i1_1	1	2	2	2	3.6	3.6	3.6	68.97	631	631	4.3239e-16	321910000	15329000	0.00100876	0.100876		12			296
>c3160_g1_i1_2;>c3160_g1_i2_2	>c3160_g1_i1_2;>c3160_g1_i2_2	1;1	1;1	1;1	>c3160_g1_i1_2;>c3160_g1_i2_2	2	1	1	1	5.1	5.1	5.1	22.074	198	198;216	0.002262	222080000	22208000	0.00146146	0.146146
>c31990_g1_i4_4;>c31990_g1_i1_4;>c31990_g1_i3_4	>c31990_g1_i4_4;>c31990_g1_i1_4;>c31990_g1_i3_4	4;4;4	4;4;4	4;4;4	>c31990_g1_i4_4;>c31990_g1_i1_4;>c31990_g1_i3_4	3	4	4	4	5.4	5.4	5.4	83.799	775	775;804;809	5.7892e-25	332330000	11869000	0.000781071	0.0781071		14			497
>c32287_g1_i1_1	>c32287_g1_i1_1	4	4	4	>c32287_g1_i1_1	1	4	4	4	11.1	11.1	11.1	49.995	461	461	6.8053e-159	2725900000	181730000	0.0119592	1.19592		15			193
>c32382_g1_i1_6	>c32382_g1_i1_6	1	1	1	>c32382_g1_i1_6	1	1	1	1	4.9	4.9	4.9	33.606	325	325	0.0004247	5511800000	324220000	0.0213361	2.13361	3;4			96;98
>c32626_g1_i1_4	>c32626_g1_i1_4	3	3	1	>c32626_g1_i1_4	1	3	3	1	33.3	33.3	7.5	17.894	159	159	7.1835e-88	304780000	33864000	0.00222851	0.222851		17			77
>c32738_g1_i3_3;>c32738_g1_i1_3	>c32738_g1_i3_3;>c32738_g1_i1_3	2;2	2;2	2;2	>c32738_g1_i3_3;>c32738_g1_i1_3	2	2	2	2	17.3	17.3	17.3	24.244	231	231;249	9.7267e-56	43536000	10884000	0.00071625	0.071625
>c86157_g1_i1_5;>c33482_g1_i1_1;>c41117_g4_i3_6;>c41117_g4_i2_5;>c41117_g4_i1_5;>c37421_g1_i1_3;>c37421_g1_i3_3;>c37421_g1_i2_2;>c37421_g1_i4_2;>c37421_g1_i5_3	>c86157_g1_i1_5;>c33482_g1_i1_1;>c41117_g4_i3_6;>c41117_g4_i2_5;>c41117_g4_i1_5	3;3;3;3;3;1;1;1;1;1	1;1;1;1;1;0;0;0;0;0	1;1;1;1;1;0;0;0;0;0	>c86157_g1_i1_5;>c33482_g1_i1_1;>c41117_g4_i3_6;>c41117_g4_i2_5;>c41117_g4_i1_5	10	3	1	1	16.8	10.2	10.2	14.769	137	137;194;496;790;807;122;136;257;273;304	5.0622e-32	156280000	19534000	0.00128549	0.128549
>c33816_g1_i1_5	>c33816_g1_i1_5	1	1	1	>c33816_g1_i1_5	1	1	1	1	2.7	2.7	2.7	47.096	440	440	0.0019814	866590000	34664000	0.00228116	0.228116			21			278
>c33984_g1_i2_3;>c33984_g1_i1_3;>c33984_g1_i1_1	>c33984_g1_i2_3	5;2;2	5;2;2	5;2;2	>c33984_g1_i2_3	3	5	5	5	12.7	12.7	12.7	67.057	598	598;617;617	2.2059e-20	255160000	7087900	0.000466438	0.0466438		19			365
>c344_g1_i1_3	>c344_g1_i1_3	1	1	1	>c344_g1_i1_3	1	1	1	1	9	9	9	18.037	166	166	0.0014907	1081400000	108140000	0.00711644	0.711644
>c35050_g1_i1_1;>c35050_g1_i2_3;>c35050_g1_i3_3	>c35050_g1_i1_1;>c35050_g1_i2_3;>c35050_g1_i3_3	2;1;1	2;1;1	2;1;1	>c35050_g1_i1_1;>c35050_g1_i2_3;>c35050_g1_i3_3	3	2	2	2	35.3	35.3	35.3	9.3012	85	85;369;418	1.0109e-31	305570000	76393000	0.00502724	0.502724
>c35111_g1_i1_5	>c35111_g1_i1_5	1	1	1	>c35111_g1_i1_5	1	1	1	1	1.7	1.7	1.7	82.506	711	711	5.2726e-06	62462000	1688200	0.000111096	0.0111096		21			336
>c3544_g1_i1_1	>c3544_g1_i1_1	1	1	1	>c3544_g1_i1_1	1	1	1	1	13.6	13.6	13.6	8.9414	81	81	8.801e-06	1028300000	257070000	0.0169172	1.69172		22			43
>c35785_g1_i2_3;>c35785_g1_i1_3;>c35785_g1_i3_3	>c35785_g1_i2_3;>c35785_g1_i1_3;>c35785_g1_i3_3	3;3;2	1;1;0	0;0;0	>c35785_g1_i2_3;>c35785_g1_i1_3;>c35785_g1_i3_3	3	3	1	0	9.8	2.1	0	58.043	532	532;603;567	3.2562e-87	425900000	17036000	0.0011211	0.11211		17			124
>c35925_g1_i3_2	>c35925_g1_i3_2	1	1	1	>c35925_g1_i3_2	1	1	1	1	2.5	2.5	2.5	50.827	478	478	1.9237e-34	56737000	4728100	0.000311145	0.0311145
>c36203_g1_i1_2	>c36203_g1_i1_2	1	1	1	>c36203_g1_i1_2	1	1	1	1	7.7	7.7	7.7	19.783	194	194	0.002394	4259100	327620	2.15599e-05	0.00215599
>c36461_g1_i1_1	>c36461_g1_i1_1	1	1	1	>c36461_g1_i1_1	1	1	1	1	1.9	1.9	1.9	71.168	722	722	1.7294e-31	109450000	3420300	0.000225082	0.0225082
>c36846_g1_i1_5	>c36846_g1_i1_5	2	2	2	>c36846_g1_i1_5	1	2	2	2	4.8	4.8	4.8	60.497	541	541	1.308e-23	130270000	4070800	0.00026789	0.026789
>c36962_g2_i2_6;>c36962_g2_i1_6	>c36962_g2_i2_6;>c36962_g2_i1_6	1;1	1;1	1;1	>c36962_g2_i2_6;>c36962_g2_i1_6	2	1	1	1	10.8	10.8	10.8	11.343	111	111;124	0.00018341	2609500000	521900000	0.034345	3.4345
>c36962_g2_i3_6;>c80079_g1_i1_2	>c36962_g2_i3_6;>c80079_g1_i1_2	1;1	1;1	1;1	>c36962_g2_i3_6;>c80079_g1_i1_2	2	1	1	1	14.7	14.7	14.7	7.7642	75	75;112	0.00012322	170570000	34113000	0.0022449	0.22449
>c37486_g1_i1_5	>c37486_g1_i1_5	3	2	2	>c37486_g1_i1_5	1	3	2	2	8.5	5.9	5.9	44.113	410	410	7.0265e-41	433240000	27078000	0.00178194	0.178194		26			105
>c37591_g1_i3_5	>c37591_g1_i3_5	5	5	5	>c37591_g1_i3_5	1	5	5	5	8.9	8.9	8.9	73.494	665	665	1.2186e-139	3942700000	187750000	0.0123554	1.23554
>c37823_g1_i2_4	>c37823_g1_i2_4	1	1	1	>c37823_g1_i2_4	1	1	1	1	1.9	1.9	1.9	86.496	788	788	3.078e-06	6618400	161430	1.06233e-05	0.00106233
>c38115_g1_i1_5	>c38115_g1_i1_5	1	1	1	>c38115_g1_i1_5	1	1	1	1	8.7	8.7	8.7	27.98	253	253	7.3354e-223	81643000	6280200	0.000413285	0.0413285
>c38115_g2_i1_3	>c38115_g2_i1_3	1	1	1	>c38115_g2_i1_3	1	1	1	1	7.3	7.3	7.3	26.785	248	248	2.0329e-09	351480000	35148000	0.00231301	0.231301
>c38191_g1_i1_4	>c38191_g1_i1_4	2	2	2	>c38191_g1_i1_4	1	2	2	2	2.5	2.5	2.5	75.78	685	685	0.00031663	52810000	1650300	0.000108602	0.0108602
>c56830_g1_i1_1;>c40955_g3_i1_6;>c40955_g3_i3_6;>c40955_g4_i1_6;>c40955_g3_i4_6;>c40955_g3_i2_6;>c40955_g1_i2_4;>c38258_g1_i4_3;>c40955_g1_i3_4;>c38258_g1_i2_3;>c40955_g3_i5_6;>c38258_g1_i3_1;>c38488_g1_i4_6;>c38488_g1_i3_6;>c38488_g1_i1_4;>c38258_g1_i1_3;>c38488_g1_i2_6	>c56830_g1_i1_1;>c40955_g3_i1_6;>c40955_g3_i3_6;>c40955_g4_i1_6;>c40955_g3_i4_6;>c40955_g3_i2_6;>c40955_g1_i2_4;>c38258_g1_i4_3;>c40955_g1_i3_4;>c38258_g1_i2_3;>c40955_g3_i5_6;>c38258_g1_i3_1;>c38488_g1_i4_6;>c38488_g1_i3_6;>c38488_g1_i1_4;>c38258_g1_i1_3;>c38488_g1_i2_6	1;1;1;1;1;1;1;1;1;1;1;1;1;1;1;1;1	1;1;1;1;1;1;1;1;1;1;1;1;1;1;1;1;1	1;1;1;1;1;1;1;1;1;1;1;1;1;1;1;1;1	>c56830_g1_i1_1;>c40955_g3_i1_6;>c40955_g3_i3_6;>c40955_g4_i1_6;>c40955_g3_i4_6;>c40955_g3_i2_6;>c40955_g1_i2_4;>c38258_g1_i4_3;>c40955_g1_i3_4;>c38258_g1_i2_3;>c40955_g3_i5_6;>c38258_g1_i3_1;>c38488_g1_i4_6;>c38488_g1_i3_6;>c38488_g1_i1_4;>c38258_g1_i1_3;	17	1	1	1	9.3	9.3	9.3	11.824	107	107;281;295;304;326;350;366;374;386;390;475;485;486;491;510;617;1017	5.7139e-07	247020000	41171000	0.00270937	0.270937		27			39
>c38723_g1_i1_3	>c38723_g1_i1_3	2	2	2	>c38723_g1_i1_3	1	2	2	2	4.9	4.9	4.9	45.297	427	427	4.9823e-11	2926800000	487800000	0.032101	3.2101		28			260
>c38911_g1_i3_1;>c38911_g1_i1_1;>c38911_g1_i2_3	>c38911_g1_i3_1	3;1;1	3;1;1	3;1;1	>c38911_g1_i3_1	3	3	3	3	5.3	5.3	5.3	61.619	564	564;314;393	1.3587e-40	593430000	26974000	0.00177509	0.177509
>c39107_g1_i1_3	>c39107_g1_i1_3	3	3	3	>c39107_g1_i1_3	1	3	3	3	4.3	4.3	4.3	97.926	854	854	8.468e-28	157480000	4374500	0.000287875	0.0287875
>c39819_g2_i1_4;>c39819_g2_i2_5	>c39819_g2_i1_4;>c39819_g2_i2_5	3;3	3;3	3;3	>c39819_g2_i1_4;>c39819_g2_i2_5	2	3	3	3	6.2	6.2	6.2	73.13	659	659;678	5.1816e-08	93595000	3743800	0.000246371	0.0246371
>c39828_g1_i3_5;>c39828_g1_i1_6	>c39828_g1_i3_5;>c39828_g1_i1_6	2;2	2;2	2;2	>c39828_g1_i3_5;>c39828_g1_i1_6	2	2	2	2	3.3	3.3	3.3	113.75	1062	1062;1119	7.1595e-10	0	0	0	0		29			263
>c39925_g2_i1_4	>c39925_g2_i1_4	1	1	1	>c39925_g2_i1_4	1	1	1	1	5	5	5	22.995	218	218	0.00068418	0	0	0	0
>c39985_g1_i1_2	>c39985_g1_i1_2	1	1	1	>c39985_g1_i1_2	1	1	1	1	1.9	1.9	1.9	59.596	540	540	0.00021567	216610000	10831000	0.000712762	0.0712762		30			378
>c40022_g1_i7_2;>c40022_g1_i1_2;>c40022_g1_i11_2;>c40022_g1_i9_2;>c40022_g1_i3_2	>c40022_g1_i7_2;>c40022_g1_i1_2;>c40022_g1_i11_2;>c40022_g1_i9_2;>c40022_g1_i3_2	1;1;1;1;1	1;1;1;1;1	1;1;1;1;1	>c40022_g1_i7_2;>c40022_g1_i1_2;>c40022_g1_i11_2;>c40022_g1_i9_2;>c40022_g1_i3_2	5	1	1	1	1.6	1.6	1.6	69.624	632	632;1001;1028;1124;1177	0.00092955	0	0	0	0		31			58
>c40125_g1_i3_5;>c40125_g1_i4_6;>c40125_g1_i5_6	>c40125_g1_i3_5;>c40125_g1_i4_6;>c40125_g1_i5_6	1;1;1	1;1;1	1;1;1	>c40125_g1_i3_5;>c40125_g1_i4_6;>c40125_g1_i5_6	3	1	1	1	2.3	2.3	2.3	95.809	854	854;1073;1075	4.195e-29	26623000	806750	5.30903e-05	0.00530903
>c40249_g1_i3_3;>c40249_g1_i2_3;>c40249_g1_i1_3	>c40249_g1_i3_3;>c40249_g1_i2_3;>c40249_g1_i1_3	2;2;2	2;2;2	2;2;2	>c40249_g1_i3_3;>c40249_g1_i2_3;>c40249_g1_i1_3	3	2	2	2	5.3	5.3	5.3	56.838	530	530;633;662	2.7436e-24	783240000	39162000	0.00257716	0.257716
>c40252_g1_i4_1;>c40252_g1_i2_1;>c40252_g1_i1_1	>c40252_g1_i4_1;>c40252_g1_i2_1;>c40252_g1_i1_1	1;1;1	1;1;1	1;1;1	>c40252_g1_i4_1;>c40252_g1_i2_1;>c40252_g1_i1_1	3	1	1	1	1.5	1.5	1.5	115.21	1047	1047;1049;1053	0.0004642	0	0	0	0
>c40375_g1_i4_5;>c40375_g1_i3_4	>c40375_g1_i4_5;>c40375_g1_i3_4	1;1	1;1	1;1	>c40375_g1_i4_5;>c40375_g1_i3_4	2	1	1	1	1.3	1.3	1.3	86.683	779	779;812	0.0024963	0	0	0	0
>c40434_g1_i1_2;>c40434_g1_i2_2	>c40434_g1_i1_2;>c40434_g1_i2_2	2;2	2;2	2;2	>c40434_g1_i1_2;>c40434_g1_i2_2	2	2	2	2	4.8	4.8	4.8	61.004	565	565;566	1.4496e-60	110810000	3574600	0.000235236	0.0235236		32			212
>c40551_g1_i1_3	>c40551_g1_i1_3	2	2	2	>c40551_g1_i1_3	1	2	2	2	9.3	9.3	9.3	21.005	204	204	2.4864e-05	147670000	12306000	0.000809829	0.0809829
>c40657_g1_i2_4;>c40657_g1_i1_4	>c40657_g1_i2_4;>c40657_g1_i1_4	2;1	2;1	2;1	>c40657_g1_i2_4;>c40657_g1_i1_4	2	2	2	2	3.2	3.2	3.2	95.772	856	856;197	9.9897e-23	170660000	5688600	0.000374353	0.0374353		34;35			233;236
>c40781_g1_i1_2	>c40781_g1_i1_2	1	1	1	>c40781_g1_i1_2	1	1	1	1	1.2	1.2	1.2	141.48	1470	1470	1.0357e-18	12663000	238920	1.57228e-05	0.00157228
>c40964_g7_i1_1;>c40964_g7_i2_1;>c40964_g7_i4_2;>c40964_g7_i8_1;>c40964_g7_i7_1	>c40964_g7_i1_1;>c40964_g7_i2_1;>c40964_g7_i4_2;>c40964_g7_i8_1	5;5;5;4;1	5;5;5;4;1	5;5;5;4;1	>c40964_g7_i1_1;>c40964_g7_i2_1;>c40964_g7_i4_2;>c40964_g7_i8_1	5	5	5	5	7.9	7.9	7.9	84.977	809	809;937;984;706;376	2.63e-75	868150000	36173000	0.00238046	0.238046
>c40975_g3_i1_1;>c9997_g1_i1_5	>c40975_g3_i1_1;>c9997_g1_i1_5	3;2	3;2	3;2	>c40975_g3_i1_1;>c9997_g1_i1_5	2	3	3	3	23.8	23.8	23.8	20.312	189	189;139	1.883e-09	170000000	24286000	0.0015982	0.15982		36			102
>c40975_g4_i2_1;>c40975_g4_i1_1;>c22430_g1_i1_3;>c66174_g1_i1_2;>c38020_g1_i1_1;>c53194_g1_i1_6;>c43733_g1_i1_4;>c40975_g2_i1_1;>c40975_g2_i3_1;>c40975_g2_i2_1;CON__ENSEMBL:ENSBTAP00000025008;>c90258_g1_i1_2	>c40975_g4_i2_1;>c40975_g4_i1_1;>c22430_g1_i1_3	7;7;4;3;3;2;2;2;2;2;2;1	7;7;4;3;3;2;2;2;2;2;2;1	7;7;4;3;3;2;2;2;2;2;2;1	>c40975_g4_i2_1;>c40975_g4_i1_1;>c22430_g1_i1_3	12	7	7	7	26.9	26.9	26.9	35.718	316	316;355;216;90;503;70;81;272;276;308;536;139	6.6045e-127	441170000	33936000	0.00223325	0.223325		37;38;39;40;41			88;98;124;161;219
>c41069_g1_i1_3;>c41069_g1_i2_3	>c41069_g1_i1_3;>c41069_g1_i2_3	3;3	3;3	3;3	>c41069_g1_i1_3;>c41069_g1_i2_3	2	3	3	3	3	3	3	146.53	1346	1346;1347	5.7205e-64	336780000	6236600	0.000410416	0.0410416
>c41075_g1_i4_4;>c41075_g1_i2_4;>c57135_g1_i1_2;>c18910_g1_i1_2;>c2468_g1_i1_1;>c39671_g2_i1_3;>c39671_g1_i1_3;>c31580_g1_i3_4;>c31580_g1_i2_4;>c41075_g1_i5_5;>c41075_g1_i1_4;>c41075_g1_i3_5	>c41075_g1_i4_4;>c41075_g1_i2_4;>c57135_g1_i1_2	13;13;8;2;2;2;1;1;1;1;1;1	13;13;8;2;2;2;1;1;1;1;1;1	8;8;8;0;0;0;0;1;1;0;0;0	>c41075_g1_i4_4;>c41075_g1_i2_4;>c57135_g1_i1_2	12	13	13	8	23.8	23.8	9.8	49.019	449	449;462;67;86;105;339;251;343;373;751;827;848	1.1162e-223	7305200000	292210000	0.0192296	1.92296		42;43	5		61;64	69
>c41117_g3_i2_4;>c41117_g3_i3_5;>c41117_g3_i1_5;>c41117_g3_i4_6;>c41117_g2_i1_4	>c41117_g3_i2_4;>c41117_g3_i3_5;>c41117_g3_i1_5;>c41117_g3_i4_6	7;7;7;7;2	7;7;7;7;2	7;7;7;7;2	>c41117_g3_i2_4;>c41117_g3_i3_5;>c41117_g3_i1_5;>c41117_g3_i4_6	5	7	7	7	12.7	12.7	12.7	45.645	424	424;606;657;751;154	1.7577e-53	2262500000	119080000	0.00783637	0.783637		44			109
>c41202_g1_i3_5	>c41202_g1_i3_5	5	5	1	>c41202_g1_i3_5	1	5	5	1	12.2	12.2	3.4	64.557	584	584	5.0603e-82	336480000	11603000	0.000763566	0.0763566
>c41264_g1_i4_5;>c41264_g1_i1_4;>c41264_g1_i5_5	>c41264_g1_i4_5;>c41264_g1_i1_4	3;3;1	3;3;1	3;3;1	>c41264_g1_i4_5;>c41264_g1_i1_4	3	3	3	3	5.8	5.8	5.8	64.67	587	587;590;615	1.9351e-06	0	0	0	0
>c41299_g2_i1_6	>c41299_g2_i1_6	1	1	1	>c41299_g2_i1_6	1	1	1	1	3.4	3.4	3.4	48.57	442	442	0.00027555	0	0	0	0
>c41377_g2_i1_1;>c41377_g2_i3_1	>c41377_g2_i1_1;>c41377_g2_i3_1	4;2	2;0	2;0	>c41377_g2_i1_1;>c41377_g2_i3_1	2	4	2	2	9.8	5.5	5.5	46.014	420	420;329	6.5816e-16	242230000	9689400	0.000637636	0.0637636
>c41377_g2_i2_1	>c41377_g2_i2_1	4	4	2	>c41377_g2_i2_1	1	4	4	2	8.8	8.8	4.8	49.051	456	456	1.6958e-13	190400000	7933400	0.000522078	0.0522078		46			177
>c41414_g3_i1_2;>c41414_g4_i1_3	>c41414_g3_i1_2;>c41414_g4_i1_3	1;1	1;1	1;1	>c41414_g3_i1_2;>c41414_g4_i1_3	2	1	1	1	3.7	3.7	3.7	35.086	322	322;522	4.9913e-05	203300000	15638000	0.0010291	0.10291		47			161
>c93701_g1_i1_1;>c41484_g1_i1_1	>c93701_g1_i1_1;>c41484_g1_i1_1	1;1	1;1	1;1	>c93701_g1_i1_1;>c41484_g1_i1_1	2	1	1	1	15	15	15	11.784	107	107;1326	0.00052767	44240000	6319900	0.000415898	0.0415898
>c41584_g1_i8_4;>c41584_g1_i6_6;>c41584_g1_i3_4	>c41584_g1_i8_4;>c41584_g1_i6_6;>c41584_g1_i3_4	2;1;1	2;1;1	1;0;1	>c41584_g1_i8_4;>c41584_g1_i6_6;>c41584_g1_i3_4	3	2	2	1	3.9	3.9	2.2	50.611	464	464;256;410	6.4232e-10	243840000	11611000	0.000764092	0.0764092
>c41679_g3_i1_3	>c41679_g3_i1_3	1	1	1	>c41679_g3_i1_3	1	1	1	1	2	2	2	61.406	562	562	0.00092503	498200000	18452000	0.00121428	0.121428
>c41686_g1_i1_4	>c41686_g1_i1_4	1	1	1	>c41686_g1_i1_4	1	1	1	1	1.6	1.6	1.6	59.947	562	562	0.00010302	53226000	2314200	0.000152292	0.0152292
>c41693_g1_i1_5;>c41693_g1_i7_5;>c41693_g1_i3_6	>c41693_g1_i1_5;>c41693_g1_i7_5;>c41693_g1_i3_6	1;1;1	1;1;1	1;1;1	>c41693_g1_i1_5;>c41693_g1_i7_5;>c41693_g1_i3_6	3	1	1	1	5	5	5	39.675	362	362;377;407	7.1837e-41	215860000	14391000	0.000947037	0.0947037
>c41697_g1_i5_6	>c41697_g1_i5_6	1	1	1	>c41697_g1_i5_6	1	1	1	1	2.5	2.5	2.5	57.014	524	524	0.0017946	69648000	2487400	0.00016369	0.016369	6;7		6;31	395;396		393;397
>c41727_g3_i2_1;>c41727_g3_i3_1;>c41727_g3_i1_1	>c41727_g3_i2_1;>c41727_g3_i3_1;>c41727_g3_i1_1	2;2;1	2;2;1	2;2;1	>c41727_g3_i2_1;>c41727_g3_i3_1;>c41727_g3_i1_1	3	2	2	2	5	5	5	48.486	441	441;458;474	3.1598e-06	151340000	7965400	0.000524184	0.0524184
>c41731_g1_i13_5	>c41731_g1_i13_5	1	1	1	>c41731_g1_i13_5	1	1	1	1	1.7	1.7	1.7	71.508	640	640	9.9742e-08	255370000	7980400	0.000525171	0.0525171
>c41875_g1_i2_2;>c41875_g1_i7_2;>c41875_g1_i4_2	>c41875_g1_i2_2;>c41875_g1_i7_2;>c41875_g1_i4_2	1;1;1	1;1;1	1;1;1	>c41875_g1_i2_2;>c41875_g1_i7_2;>c41875_g1_i4_2	3	1	1	1	2.2	2.2	2.2	44.561	406	406;768;787	0.0010538	421440000	18324000	0.00120586	0.120586			51;52			5;8
>c41884_g1_i6_4;>c41884_g1_i2_4;>c41884_g1_i1_6	>c41884_g1_i6_4;>c41884_g1_i2_4;>c41884_g1_i1_6	2;2;2	2;2;2	2;2;2	>c41884_g1_i6_4;>c41884_g1_i2_4;>c41884_g1_i1_6	3	2	2	2	2	2	2	122.3	1097	1097;1119;1120	8.4714e-09	89545000	1468000	9.66056e-05	0.00966056
>c41889_g3_i8_5;>c41889_g3_i4_5	>c41889_g3_i8_5;>c41889_g3_i4_5	2;2	2;2	2;2	>c41889_g3_i8_5;>c41889_g3_i4_5	2	2	2	2	3.2	3.2	3.2	118.13	1080	1080;1105	1.218e-87	13543000	322440	2.1219e-05	0.0021219
>c47508_g1_i1_1	>c47508_g1_i1_1	1	1	1	>c47508_g1_i1_1	1	1	1	1	7.7	7.7	7.7	13.003	130	130	6.2568e-06	10063000	1118200	7.35861e-05	0.00735861
>c53634_g1_i1_3	>c53634_g1_i1_3	1	1	1	>c53634_g1_i1_3	1	1	1	1	22.1	22.1	22.1	7.423	68	68	1.1004e-20	2501700000	1250900000	0.0823187	8.23187		48			47
>c54677_g1_i1_2;>c28941_g1_i1_1;>c41646_g5_i1_1;>c82799_g1_i1_4;>c89657_g1_i1_2;>c41646_g6_i1_1;>c21197_g1_i1_6;>c39900_g2_i3_3;>c39900_g2_i1_3;>c37205_g1_i1_6;>c31976_g1_i1_3;>c28941_g1_i2_3;>c28941_g1_i3_3;>c39900_g2_i2_3;>c39660_g1_i1_1;>c39660_g1_i2_2;>c39900_g2_i4_3;>c51508_g1_i1_1;>c1923_g1_i1_2;>c26378_g1_i1_2;>c13969_g1_i1_5	>c54677_g1_i1_2;>c28941_g1_i1_1;>c41646_g5_i1_1;>c82799_g1_i1_4;>c89657_g1_i1_2;>c41646_g6_i1_1;>c21197_g1_i1_6;>c39900_g2_i3_3;>c39900_g2_i1_3;>c37205_g1_i1_6;>c31976_g1_i1_3;>c28941_g1_i2_3;>c28941_g1_i3_3;>c39900_g2_i2_3;>c39660_g1_i1_1;>c39660_g1_i2_2;>c39900_g2_i4_3	6;4;4;4;4;4;4;4;4;3;3;3;3;3;3;3;3;2;2;1;1	6;4;4;4;4;4;4;4;4;3;3;3;3;3;3;3;3;2;2;1;1	6;4;4;4;4;4;4;4;4;3;3;3;3;3;3;3;3;2;2;1;1	>c54677_g1_i1_2;>c28941_g1_i1_1;>c41646_g5_i1_1;>c82799_g1_i1_4;>c89657_g1_i1_2;>c41646_g6_i1_1;>c21197_g1_i1_6;>c39900_g2_i3_3;>c39900_g2_i1_3;>c37205_g1_i1_6;>c31976_g1_i1_3;>c28941_g1_i2_3;>c28941_g1_i3_3;>c39900_g2_i2_3;>c39660_g1_i1_1;>c39660_g1_i2_2;	21	6	6	6	75.7	75.7	75.7	19.845	177	177;71;84;87;90;210;239;325;364;76;84;84;100;342;363;378;381;74;76;96;129	1.2046e-133	4548400000	413500000	0.0272115	2.72115
>c58256_g1_i1_2	>c58256_g1_i1_2	1	1	1	>c58256_g1_i1_2	1	1	1	1	11.1	11.1	11.1	11.715	108	108	0.0011286	39527000	4940800	0.000325142	0.0325142
>c58706_g1_i1_2	>c58706_g1_i1_2	1	1	1	>c58706_g1_i1_2	1	1	1	1	24.3	24.3	24.3	6.6352	74	74	3.0374e-17	9132400	1826500	0.000120198	0.0120198
>c64227_g1_i1_3	>c64227_g1_i1_3	3	3	3	>c64227_g1_i1_3	1	3	3	3	12.6	12.6	12.6	20.659	182	182	2.4009e-48	1121100000	160160000	0.0105397	1.05397
>c64904_g1_i1_3	>c64904_g1_i1_3	2	1	1	>c64904_g1_i1_3	1	2	1	1	16	6.7	6.7	13.532	119	119	4.8528e-07	19980000	2497500	0.000164355	0.0164355
>c65284_g1_i1_4	>c65284_g1_i1_4	4	4	4	>c65284_g1_i1_4	1	4	4	4	32.2	32.2	32.2	23.773	214	214	3.9103e-61	248740000	22613000	0.00148811	0.148811
>c66270_g1_i1_6	>c66270_g1_i1_6	1	1	1	>c66270_g1_i1_6	1	1	1	1	8.1	8.1	8.1	17.638	161	161	1.8244e-08	401200000	57315000	0.00377176	0.377176	8			22
>c67079_g1_i1_3	>c67079_g1_i1_3	1	1	1	>c67079_g1_i1_3	1	1	1	1	19	19	19	8.2973	79	79	0.0012953	0	0	0	0			40			32
>c6913_g1_i1_1	>c6913_g1_i1_1	2	1	1	>c6913_g1_i1_1	1	2	1	1	15.5	10.6	10.6	24.756	226	226	1.8175e-12	20145000	1678700	0.000110471	0.0110471
>c69881_g1_i1_5	>c69881_g1_i1_5	1	1	1	>c69881_g1_i1_5	1	1	1	1	9.6	9.6	9.6	10.093	94	94	0.00013801	23610000	4722000	0.000310744	0.0310744
>c7640_g1_i1_5	>c7640_g1_i1_5	1	1	1	>c7640_g1_i1_5	1	1	1	1	5.8	5.8	5.8	16.049	156	156	0.0023456	346940000	115650000	0.00761065	0.761065
>c7761_g1_i1_1	>c7761_g1_i1_1	2	2	2	>c7761_g1_i1_1	1	2	2	2	6.2	6.2	6.2	24.828	226	226	3.3358e-25	31354000000	7838500000	0.515833	51.5833
>c80614_g1_i1_3	>c80614_g1_i1_3	2	2	2	>c80614_g1_i1_3	1	2	2	2	26.7	26.7	26.7	9.6779	86	86	3.0047e-06	250510000	50102000	0.00329709	0.329709
>c94913_g1_i1_1	>c94913_g1_i1_1	4	4	3	>c94913_g1_i1_1	1	4	4	3	6.7	6.7	5.2	80.146	734	734	3.5077e-33	634400000	16695000	0.00109866	0.109866		51			79
>c95078_g1_i1_2	>c95078_g1_i1_2	1	1	1	>c95078_g1_i1_2	1	1	1	1	11	11	11	14.241	136	136	9.2361e-36	334960000	55826000	0.00367378	0.367378
>c96404_g1_i1_3	>c96404_g1_i1_3	2	1	1	>c96404_g1_i1_3	1	2	1	1	20.2	20.2	20.2	8.7951	84	84	2.3429e-12	23396000	7798700	0.000513214	0.0513214
>c97612_g1_i1_1	>c97612_g1_i1_1	1	1	1	>c97612_g1_i1_1	1	1	1	1	10.2	10.2	10.2	10.838	98	98	1.586e-14	265980000	53195000	0.00350064	0.350064
>c99840_g1_i1_1	>c99840_g1_i1_1	3	3	3	>c99840_g1_i1_1	1	3	3	3	10.4	10.4	10.4	31.729	297	297	1.6482e-24	1136900000	126320000	0.00831282	0.831282		52			62
SUM																		15195809060		100
																		100
