# Supplementary material for: The Skeleton Forming Proteome of an Early Branching Metazoan: A Molecular Survey of the Biomineralization Components Employed by the Coralline Sponge Vaceletia Sp
Source: PLoS One. 2015 Nov 4;10(11):e0140100. doi: 10.1371/journal.pone.0140100 (PMC4633127; doi:10.1371/journal.pone.0140100)
Supplement: S5 File — (XLS) [file pone.0140100.s005.xls]

## Sheet: peptides
Sequence	N-term cleavage window	C-term cleavage window	Length	Missed cleavages	Mass	Proteins	Leading razor protein	Start position	End position	Unique (Groups)	Unique (Proteins)	Charges	PEP	Score	Intensity	Hydroxyproline site IDs	Oxidation (M) site IDs	Phospho (STY) site IDs
AAIAVFNR	LSRLVFNRAAIAVFNR	AAIAVFNRVGGGEFLP	8	0	860.487	>c41727_g3_i2_1;>c41727_g3_i3_1	>c41727_g3_i2_1	240	247	yes	no	2	0.0022715	134.66	82458000
AAVPSGASTGIYEALELR	TTSKGTYRAAVPSGAS	IYEALELRDKDPSRFM	18	0	1803.94	>c38115_g2_i1_3	>c38115_g2_i1_3	43	60	yes	yes	2;3	2.0329e-09	138.05	351480000
AGAGSATLSMAYAGAR	GTEVVNAKAGAGSATL	SMAYAGARFVFSLIGA	16	0	1453.7	>c39828_g1_i3_5;>c39828_g1_i1_6	>c39828_g1_i3_5	254	269	yes	no	2	0.0018732	90.853	0		29
AGFAGDDAPR	DNGSGMCKAGFAGDDA	FAGDDAPRAVFPSIVG	10	0	975.441	>c41075_g1_i4_4;>c41075_g1_i2_4;>c57135_g1_i1_2	>c41075_g1_i4_4	36	45	yes	no	2	0.0060768	102.06	1147300000
AGLQFPVGR	KVKSRSGRAGLQFPVG	GLQFPVGRVHRMMRGG	9	0	943.524	>c86157_g1_i1_5;>c33482_g1_i1_1;>c41117_g4_i3_6;>c41117_g4_i2_5;>c41117_g4_i1_5;>c37421_g1_i1_3;>c37421_g1_i3_3;>c37421_g1_i2_2;>c37421_g1_i4_2;>c37421_g1_i5_3;>c20021_g1_i1_2	>c20021_g1_i1_2	27	35	no	no	2	0.00011344	138.54	848610000
ALPLDMFLR	VQFVNSWRALPLDMFL	LPLDMFLRDEARKECG	9	0	1074.59	>c31462_g1_i1_1	>c31462_g1_i1_1	291	299	yes	yes	2	0.0039378	100.02	299000000		12
ALTVPELTQQMFDAK	SRGSQQYRALTVPELT	TQQMFDAKNMMAACDP	15	0	1690.86	>c40975_g4_i2_1;>c40975_g4_i1_1;>c22430_g1_i1_3;>c43733_g1_i1_4	>c40975_g4_i2_1	114	128	yes	no	2	0.0087645	80.387	11336000		37
ARFEELNADLFR	DFYTSITRARFEELNA	ELNADLFRGTLDPVEK	12	1	1479.75	>c65284_g1_i1_4	>c65284_g1_i1_4	142	153	yes	yes	2	1.4946e-20	177.36	48052000
ATDTVSEDDDHVTITIVR	DVTVRFDKATDTVSED	HVTITIVRVGU_____	18	0	1985.95	>c35050_g1_i1_1;>c35050_g1_i2_3;>c35050_g1_i3_3	>c35050_g1_i1_1	65	82	yes	no	3	3.4723e-18	158.98	74716000
AVDVFVTR	GSLQDRSRAVDVFVTR	AVDVFVTRIFTTQFLA	8	0	905.497	>c41264_g1_i4_5;>c41264_g1_i1_4	>c41264_g1_i4_5	340	347	yes	no	2	0.02792	107.57	0
AVFPSIVGR	FAGDDAPRAVFPSIVG	VFPSIVGRPRHQGVMV	9	0	944.544	>c41075_g1_i4_4;>c41075_g1_i2_4;>c57135_g1_i1_2	>c41075_g1_i4_4	46	54	yes	no	2	0.013061	101.72	538790000
AVFPSIVGRPR	FAGDDAPRAVFPSIVG	PSIVGRPRHQGVMVGM	11	1	1197.7	>c41075_g1_i4_4;>c41075_g1_i2_4;>c57135_g1_i1_2	>c41075_g1_i4_4	46	56	yes	no	2;3	7.5554e-09	158.94	1013900000
AVLDKDITTER	FKKFDEGKAVLDKDIT	DKDITTERIEEFVTGE	11	1	1259.67	>c36846_g1_i1_5	>c36846_g1_i1_5	236	246	yes	yes	3	0.0005484	100.93	21061000
AVLVDLEPGTMDSVR	TGGKYVPRAVLVDLEP	PGTMDSVRSGPFGQVF	15	0	1600.81	>c40975_g3_i1_1;>c9997_g1_i1_5	>c40975_g3_i1_1	92	106	yes	no	2	0.00037934	109.1	110090000		36
AVMLSLPLQVER	IEAIEFIKAVMLSLPL	SLPLQVERGFPDLPGD	12	0	1354.76	>c31990_g1_i4_4;>c31990_g1_i1_4;>c31990_g1_i3_4	>c31990_g1_i4_4	495	506	yes	no	2	1.0051e-14	164.9	126160000		14
AVNVFLR	QQFTNSWRAVNVFLRD	RAVNVFLRDMPRDICS	7	0	817.481	>c32287_g1_i1_1	>c32287_g1_i1_1	118	124	yes	yes	2	0.016016	137.83	988340000
AVVEVMATGR	TVGVNDTRAVVEVMAT	VEVMATGRFRETFMIE	10	0	1031.54	>c38723_g1_i1_3	>c38723_g1_i1_3	255	264	yes	yes	2	0.0056132	89.827	839510000		28
AVVQVFEGTSGIDAK	VLEVTGSKAVVQVFEG	GTSGIDAKYTTCEFTG	15	0	1519.79	>c37823_g1_i2_4	>c37823_g1_i2_4	35	49	yes	yes	2	3.078e-06	131.96	6618400
AYLPVNESFGFTADLR	GAPMFVVKAYLPVNES	FGFTADLRSSTGGQAF	16	0	1798.89	>c40252_g1_i4_1;>c40252_g1_i2_1;>c40252_g1_i1_1	>c40252_g1_i4_1	456	471	yes	no	2	0.0004642	106.6	0
CSGTQVVPVR	________________	GTQVVPVRLSNGLNNK	10	0	1101.56	>c102844_g1_i1_3	>c102844_g1_i1_3	5	14	yes	yes	2	1.1371e-26	204.34	589900000
DAGTIAGLNVLR	DSQRQATKDAGTIAGL	IAGLNVLRIINEPTAA	12	0	1198.67	>c94913_g1_i1_1	>c94913_g1_i1_1	178	189	yes	yes	2	0.00076156	103.91	34044000
DAVTYTEHAK	VFLENVIRDAVTYTEH	VTYTEHAKRKTVTAMD	10	0	1133.54	>c41117_g3_i2_4;>c41117_g3_i3_5;>c41117_g3_i1_5;>c41117_g3_i4_6	>c41117_g3_i2_4	93	102	yes	no	2;3	0.0031125	115.78	83055000
DAVTYTEHAKR	VFLENVIRDAVTYTEH	TYTEHAKRKTVTAMDV	11	1	1289.64	>c41117_g3_i2_4;>c41117_g3_i3_5;>c41117_g3_i1_5;>c41117_g3_i4_6	>c41117_g3_i2_4	93	103	yes	no	3	0.00038068	103.08	94803000
DIVIEETMEDMDKDR	PEDVSHMKDIVIEETM	MEDMDKDRDGYITVEE	15	1	1837.81	>c40657_g1_i2_4	>c40657_g1_i2_4	226	240	yes	yes	2;3	1.1467e-20	169.37	170660000		34;35
DLTDYLMK	LRLDLAGRDLTDYLMK	DLTDYLMKILTERGYS	8	0	997.479	>c41075_g1_i4_4;>c41075_g1_i2_4;>c39671_g2_i1_3;>c39671_g1_i1_3;>c14026_g1_i1_3	>c41075_g1_i4_4	201	208	no	no	2	0.031235	79.809	97415000
DLVMISAQQDLR	APYVNVTRDLVMISAQ	ISAQQDLRLHCKVTGE	12	0	1387.71	>c41414_g3_i1_2;>c41414_g4_i1_3	>c41414_g3_i1_2	158	169	yes	no	2	4.9913e-05	128.1	203300000		47
DLYANTVLSGGTTMYPGIADR	KCDVDIRKDLYANTVL	MYPGIADRMQKEITAL	21	0	2214.06	>c21396_g1_i1_4	>c21396_g1_i1_4	28	48	yes	yes	2;3	2.3097e-138	270.37	191700000		7
DNDDAPFNCAER	KSFSARDRDNDDAPFN	APFNCAERHGGWWHSH	12	0	1422.55	>c64227_g1_i1_3	>c64227_g1_i1_3	52	63	yes	yes	2	0.0029333	111.31	3509400
DNIQGITKPAIR	KRHRKILRDNIQGITK	GITKPAIRRLARRGGV	12	1	1324.75	>c41117_g3_i2_4;>c41117_g3_i3_5;>c41117_g3_i1_5;>c41117_g3_i4_6;>c41117_g2_i1_4	>c41117_g3_i2_4	49	60	yes	no	2;3	2.966e-21	187.45	998220000
DNIQGITKPAIRR	KRHRKILRDNIQGITK	ITKPAIRRLARRGGVK	13	2	1480.85	>c41117_g3_i2_4;>c41117_g3_i3_5;>c41117_g3_i1_5;>c41117_g3_i4_6;>c41117_g2_i1_4	>c41117_g3_i2_4	49	61	yes	no	3	7.8277e-05	123.95	110210000
DNNPLPIGPLGLR	DTFPRLDRDNNPLPIG	PIGPLGLRESFLNSLQ	13	0	1374.76	>c41264_g1_i4_5;>c41264_g1_i1_4;>c41264_g1_i5_5	>c41264_g1_i4_5	299	311	yes	no	2	0.0024086	101.89	0
DQLNSQLAAER	ERQEQRRRDQLNSQLA	NSQLAAERLHREGKFD	11	0	1243.62	>c39819_g2_i1_4;>c39819_g2_i2_5	>c39819_g2_i1_4	77	87	yes	no	2	0.00045223	132.69	79003000
DQVYDEGTPGVAVPLGR	RSNIVLLRDQVYDEGT	GVAVPLGRKYGHFGNS	17	0	1771.87	>c41069_g1_i1_3;>c41069_g1_i2_3	>c41069_g1_i1_3	483	499	yes	no	2	1.6812e-40	197.14	36375000
DRDNDDAPFNCAER	NGKSFSARDRDNDDAP	APFNCAERHGGWWHSH	14	1	1693.68	>c64227_g1_i1_3	>c64227_g1_i1_3	50	63	yes	yes	2;3	4.7517e-31	190.19	177340000
DSTLIMQLLR	TLSEESYKDSTLIMQL	TLIMQLLRDNLTLWTS	10	0	1188.65	>c56830_g1_i1_1;>c40955_g3_i1_6;>c40955_g3_i3_6;>c40955_g4_i1_6;>c40955_g3_i4_6;>c40955_g3_i2_6;>c40955_g1_i2_4;>c38258_g1_i4_3;>c40955_g1_i3_4;>c38258_g1_i2_3;>c40955_g3_i5_6;>c38258_g1_i3_1;>c38488_g1_i4_6;>c38488_g1_i3_6;>c38488_g1_i1_4;>c38258_g1_i1_3;>c38488_g1_i2_6	>c56830_g1_i1_1	34	43	yes	no	2	5.7139e-07	149.72	247020000		27
DSYVGDEAQSK	VMVGMGQKDSYVGDEA	VGDEAQSKRGILTLKY	11	0	1197.52	>c41075_g1_i4_4;>c41075_g1_i2_4;>c57135_g1_i1_2	>c41075_g1_i4_4	68	78	yes	no	2	0.0031467	102.4	27794000
DSYVGDEAQSKR	VMVGMGQKDSYVGDEA	GDEAQSKRGILTLKYP	12	1	1353.62	>c41075_g1_i4_4;>c41075_g1_i2_4;>c57135_g1_i1_2	>c41075_g1_i4_4	68	79	yes	no	2;3	6.2245e-07	140.24	104380000
DTDSEEEIR	TMMARKMKDTDSEEEI	TDSEEEIREAFRVFDK	9	0	1092.46	>c103979_g1_i1_6	>c103979_g1_i1_6	86	94	yes	yes	2	0.0011266	128.36	20433000
DTDSEEEIREAFR	TMMARKMKDTDSEEEI	EEIREAFRVFDKDGNG	13	1	1595.71	>c103979_g1_i1_6	>c103979_g1_i1_6	86	98	yes	yes	3	0.0013796	100.22	18136000
DTLURLLDALK	VGLTQLLKDTLURLLD	URLLDALKSYFLSYNY	11	1	1307.64	>c39925_g2_i1_4	>c39925_g2_i1_4	86	96	yes	yes	2	0.00068418	100.92	0
EAFSLFDKDGDGTITTK	EEQIAEFKEAFSLFDK	GDGTITTKELGTVMRS	17	1	1843.88	>c103979_g1_i1_6;>c39900_g1_i1_1;>c39900_g1_i2_2;>c39900_g1_i3_1;>c27518_g1_i1_4	>c103979_g1_i1_6	22	38	no	no	3	6.4533e-09	131.18	40728000
ECTDTAPTCDQVCK	________________	PTCDQVCKDTNLRAQD	14	0	1683.65	>c26034_g1_i1_1	>c26034_g1_i1_1	4	17	yes	yes	2	8.5626e-08	142.38	22701000
EEFEHQQK	DKNQTAEKEEFEHQQK	EEFEHQQKELEKVCNP	8	0	1073.48	>c64904_g1_i1_3	>c64904_g1_i1_3	81	88	yes	yes	2	1.9337e-05	169.09	19980000
EHALLAYTLGVK	ISKNGQTREHALLAYT	LAYTLGVKQLVVGVNK	12	0	1313.73	>c35785_g1_i2_3;>c35785_g1_i1_3;>c35785_g1_i3_3;>c32626_g1_i1_4	>c32626_g1_i1_4	157	168	no	no	2	4.6701e-29	200.82	39993000
EIAQDFKTDLR	LPFQRLVREIAQDFKT	QDFKTDLRFQSSAVAA	11	1	1334.68	>c27354_g1_i1_6;>c34006_g1_i2_6;>c34006_g1_i1_6	>c27354_g1_i1_6	82	92	yes	no	2;3	1.0047e-08	157.03	327800000
ELISNASDALDK	RNKEIFLRELISNASD	NASDALDKIRFLSLTD	12	0	1274.64	>c58256_g1_i1_2	>c58256_g1_i1_2	22	33	yes	yes	2	0.0011286	119.39	39527000
ELISNSSDALDK	SNKEIFLRELISNSSD	NSSDALDKIRYQSLTD	12	0	1290.63	>c39107_g1_i1_3	>c39107_g1_i1_3	72	83	yes	yes	2	0.01774	96.059	20963000
ELIVTSPDGCR	GPKFDCPKELIVTSPD	VTSPDGCRQCAVEECT	11	0	1245.6	>c41679_g3_i1_3	>c41679_g3_i1_3	467	477	yes	yes	2	0.00092503	124.67	498200000
ELTALAPSTMK	GIADRMQKELTALAPS	ALAPSTMKIKIIAPPE	11	0	1160.61	>c3544_g1_i1_1	>c3544_g1_i1_1	34	44	yes	yes	2	8.801e-06	139.31	1028300000		22
ESTLHLVLR	LSDYNIQKESTLHLVL	STLHLVLRLRGGMQIF	9	0	1066.61	>c54677_g1_i1_2;>c28941_g1_i1_1;>c41646_g5_i1_1;>c82799_g1_i1_4;>c89657_g1_i1_2;>c41646_g6_i1_1;>c21197_g1_i1_6;>c39900_g2_i3_3;>c39900_g2_i1_3;>c37205_g1_i1_6;>c31976_g1_i1_3;>c28941_g1_i2_3;>c28941_g1_i3_3;>c39900_g2_i2_3;>c39660_g1_i1_1;>c39660_g1_i2_2;>c39900_g2_i4_3;>c51508_g1_i1_1;>c1923_g1_i1_2;>c26378_g1_i1_2;>c13969_g1_i1_5	>c54677_g1_i1_2	23	31	yes	no	2;3	2.9425e-29	215.38	679620000
EVDEQMLNVQNK	FRGRMSMKEVDEQMLN	QMLNVQNKNSSYFVEW	12	0	1445.68	>c40975_g4_i2_1;>c40975_g4_i1_1;>c22430_g1_i1_3;>c38020_g1_i1_1;>c43733_g1_i1_4;>c40975_g2_i1_1;>c40975_g2_i3_1;>c40975_g2_i2_1;>c90258_g1_i1_2	>c40975_g4_i2_1	156	167	yes	no	2	5.163e-105	280.17	120440000		38
FAVTQNQLTR	TNFFVDDRFAVTQNQL	VTQNQLTRDAIQNAYD	10	0	1176.63	>c97612_g1_i1_1	>c97612_g1_i1_1	33	42	yes	yes	2	1.586e-14	175.93	265980000
FDLMYAK	AWARLDHKFDLMYAKR	KFDLMYAKRAFVHWYV	7	0	886.426	>c41202_g1_i3_5	>c41202_g1_i3_5	436	442	no	no	2	0.024211	85.359	6866800
FGFSETEAVER	TNLDVYSRFGFSETEA	SETEAVERGYLFENNP	11	0	1270.58	>c41069_g1_i1_3;>c41069_g1_i2_3	>c41069_g1_i1_3	350	360	yes	no	2	2.2325e-20	177.44	276650000
FGVEQDVDMVFASFIR	GKDIEDLKFGVEQDVD	MVFASFIRKASDVKAV	16	0	1858.89	>c40434_g1_i1_2;>c40434_g1_i2_2	>c40434_g1_i1_2	204	219	yes	no	2	2.1663e-58	224.07	85115000		32
FILEEVSAEK	TGYQSVSRFILEEVSA	LEEVSAEKSSCTNIUI	10	0	1163.61	>c38911_g1_i3_1;>c38911_g1_i1_1;>c38911_g1_i2_3	>c38911_g1_i3_1	459	468	yes	no	2	0.0072539	96.171	235280000
FLISDGER	RSGDSDPKFLISDGER	FLISDGERGIGFEMRE	8	0	935.471	>c41584_g1_i8_4;>c41584_g1_i6_6	>c41584_g1_i8_4	234	241	no	no	2	0.00029095	141.39	185090000
FPGQLNADLR	SGVTTCLRFPGQLNAD	GQLNADLRKLAVNMVP	10	0	1129.59	>c40975_g4_i2_1;>c40975_g4_i1_1;>c66174_g1_i1_2;>c38020_g1_i1_1;CON__ENSEMBL:ENSBTAP00000025008	>c40975_g4_i2_1	73	82	yes	no	2	0.005854	103.08	30185000
FQEAISEIAAAR	ASPTGFVRFQEAISEI	ISEIAAARFEACSPSG	12	0	1304.67	>c40249_g1_i3_3;>c40249_g1_i2_3;>c40249_g1_i1_3	>c40249_g1_i3_3	42	53	yes	no	2	0.00011471	132.86	347010000
FYDSPNPFTGR	SSPPLMCKFYDSPNPF	SPNPFTGRKGCQCDDG	11	0	1299.59	>c33984_g1_i2_3;>c33984_g1_i1_1	>c33984_g1_i2_3	368	378	yes	no	2	1.2594e-05	143.97	135820000
GAAITPFNR	NNLRHPLRGAAITPFN	AAITPFNRLLDSNYDN	9	0	945.503	>c80614_g1_i1_3	>c80614_g1_i1_3	54	62	yes	yes	2	0.00028735	136.8	250510000
GDLGIEIPAEK	SDGIMVARGDLGIEIP	GIEIPAEKVFLAQKMM	11	0	1140.6	>c40434_g1_i1_2;>c40434_g1_i2_2	>c40434_g1_i1_2	268	278	yes	no	2	0.0066913	99.539	25696000
GEGDISNEDFVR	KDGQKGDRGEGDISNE	ISNEDFVRYRKILFEV	12	0	1336.59	>c29357_g1_i1_2	>c29357_g1_i1_2	148	159	yes	yes	2	8.0721e-35	211.46	2204100000
GETGGSGLQGPLGPIGDK	________________	PLGPIGDKGPTGLQGI	18	0	1638.82	>c58706_g1_i1_2	>c58706_g1_i1_2	4	21	yes	yes	2	3.0374e-17	158.52	9132400
GHYTEGAELVDSVLDVVR	GAGNNWAKGHYTEGAE	DSVLDVVRKESEGCDC	18	0	1957.97	>c40975_g3_i1_1;>c9997_g1_i1_5	>c40975_g3_i1_1	133	150	yes	no	3	0.00023081	95.9	34503000
GLTGPAGLNGQDGIDGQR	AQGQRGDRGLTGPAGL	QDGIDGQRGPLGPAGV	18	0	1724.84	>c40781_g1_i1_2	>c40781_g1_i1_2	262	279	yes	yes	2	1.0357e-18	164.53	12663000
GMGGAFVLVLYDELK	GAWSNVLRGMGGAFVL	LVLYDELKKVIUTCPR	15	0	1610.84	>c20088_g1_i1_5	>c20088_g1_i1_5	247	261	yes	yes	2	0.0015441	80.632	0		6
GPNPVCTADGEPEYR	NIKFYLPKGPNPVCTA	ADGEPEYRVRFKSTWT	15	0	1660.72	>c37591_g1_i3_5	>c37591_g1_i3_5	337	351	yes	yes	2	1.5957e-116	266.28	275160000
GVQLVGESFTPVIK	STANTTGKGVQLVGES	ESFTPVIKKRCEDGPI	14	0	1472.82	>c33984_g1_i2_3;>c33984_g1_i1_3	>c33984_g1_i2_3	52	65	yes	no	2	7.1656e-08	143.98	77000000
GVVDSEDLPLNISR	PEYLNFIKGVVDSEDL	DLPLNISREMLQQSKV	14	0	1512.78	>c39107_g1_i1_3	>c39107_g1_i1_3	410	423	yes	yes	2	4.603e-23	179.65	93731000
GYSFTTTAER	LMKILTERGYSFTTTA	SFTTTAEREIVRDIKE	10	0	1131.52	>c41075_g1_i4_4;>c41075_g1_i2_4;>c14026_g1_i1_3	>c41075_g1_i4_4	214	223	no	no	2	0.0031125	115.78	557970000
HAVSEGTK	LLPGELAKHAVSEGTK	HAVSEGTKAVTKYTSS	8	0	827.414	>c18914_g1_i1_1;>c41117_g1_i1_6;>c69201_g1_i1_2	>c18914_g1_i1_1	114	121	yes	no	2	2.097e-18	209.84	386860000
HFSVEGQLEFR	WEDHLAVKHFSVEGQL	VEGQLEFRALLFVPKR	11	0	1347.66	>c39107_g1_i1_3	>c39107_g1_i1_3	351	361	yes	yes	2	0.001037	122.34	42789000
HIAELQTQIK	EQEDLVQRHIAELQTQ	AELQTQIKECCESSQS	10	0	1179.66	>c47508_g1_i1_1	>c47508_g1_i1_1	9	18	yes	yes	2	6.2568e-06	145.28	10063000
HLQLAIR	KKLRITPRHLQLAIRN	RHLQLAIRNDEELNKL	7	0	849.518	>c86157_g1_i1_5;>c33482_g1_i1_1;>c41117_g4_i3_6;>c41117_g4_i2_5;>c41117_g4_i1_5;>c96404_g1_i1_3;>c20021_g1_i1_2	>c20021_g1_i1_2	88	94	no	no	2	0.00096371	174.64	4571600000
HLQLAIRGDEELDSLIK	KVQRITPRHLQLAIRG	EELDSLIKATIPGGGV	17	1	1949.06	>c96404_g1_i1_3	>c96404_g1_i1_3	42	58	yes	yes	3	2.4311e-09	136.39	23396000
HLQLAIRNDEELNK	KKLRITPRHLQLAIRN	RNDEELNKLLADVTIA	14	1	1691.9	>c86157_g1_i1_5;>c33482_g1_i1_1;>c41117_g4_i3_6;>c41117_g4_i2_5;>c41117_g4_i1_5	>c86157_g1_i1_5	88	101	yes	no	3	4.6306e-25	189.1	156280000
HMGNIEIISNK	VGDLSVERHMGNIEII	NIEIISNKNCAVTTLI	11	0	1254.64	>c99840_g1_i1_1	>c99840_g1_i1_1	61	71	yes	yes	2	0.014772	79.744	38867000		52
HQGVMVGMGQK	PSIVGRPRHQGVMVGM	VMVGMGQKDSYVGDEA	11	0	1170.56	>c41075_g1_i4_4;>c41075_g1_i2_4;>c57135_g1_i1_2;>c31580_g1_i3_4;>c31580_g1_i2_4	>c41075_g1_i4_4	57	67	yes	no	2;3	0.00012065	121.36	1183100000		42;43
HQGVMVGMGQKDSYVGDEAQSK	PSIVGRPRHQGVMVGM	VGDEAQSKRGILTLKY	22	1	2350.07	>c41075_g1_i4_4;>c41075_g1_i2_4;>c57135_g1_i1_2	>c41075_g1_i4_4	57	78	yes	no	3;4	1.8815e-07	110.98	13599000		42;43
HQGVMVGMGQKDSYVGDEAQSKR	PSIVGRPRHQGVMVGM	GDEAQSKRGILTLKYP	23	2	2506.17	>c41075_g1_i4_4;>c41075_g1_i2_4;>c57135_g1_i1_2	>c41075_g1_i4_4	57	79	yes	no	4	1.9229e-59	195.03	111020000		42;43	5
IASNVGVTASPTGFVR	SNMQVYERIASNVGVT	ASPTGFVRFQEAISEI	16	0	1574.84	>c40249_g1_i3_3;>c40249_g1_i2_3;>c40249_g1_i1_3	>c40249_g1_i3_3	26	41	yes	no	2	2.3917e-20	171.15	436230000
ICSELFSTATK	NKWRRYVKICSELFST	ELFSTATKSDRVATPN	11	0	1255.61	>c37591_g1_i3_5	>c37591_g1_i3_5	483	493	yes	yes	2	0.0029975	103.43	85801000
IDDHTILR	LTAVNFNKIDDHTILR	IDDHTILRITWEGNMR	8	0	981.524	>c38911_g1_i3_1	>c38911_g1_i3_1	30	37	yes	yes	2	0.00012975	158.07	99991000
IDGQTTPSDITITFR	CGNQIDSRIDGQTTPS	SDITITFRSNEMVENN	15	0	1663.84	>c36203_g1_i1_2	>c36203_g1_i1_2	39	53	yes	yes	2	0.002394	105.17	4259100
IEDNNTLVFIVDVK	TTESAMKKIEDNNTLV	LVFIVDVKANKHQIKQ	14	0	1617.86	>c103713_g1_i1_5	>c103713_g1_i1_5	58	71	yes	yes	2	1.893e-13	149.6	0
IENPSFVELR	TQATKSGRIENPSFVE	NPSFVELRFSSAKRCN	10	0	1202.63	>c40375_g1_i4_5;>c40375_g1_i3_4	>c40375_g1_i4_5	677	686	yes	no	2	0.0024963	99.283	0
IGGIGTVPVGR	LPLQDVYKIGGIGTVP	IGTVPVGRVETGILKP	11	0	1024.6	>c35785_g1_i2_3;>c35785_g1_i1_3;>c37486_g1_i1_5	>c35785_g1_i2_3	278	288	no	no	2	0.00056004	130.98	425900000
IINEPTAAALAYGLDK	IAGLEVKRIINEPTAA	ALAYGLDKSKAGDRKI	16	0	1658.89	>c93701_g1_i1_1;>c41484_g1_i1_1	>c93701_g1_i1_1	78	93	yes	no	2	0.00052767	111.22	44240000
IIVVQQAIATNR	SNRSQKGKIIVVQQAI	QQAIATNRIGLNGGQV	12	0	1324.78	>c41069_g1_i1_3;>c41069_g1_i2_3	>c41069_g1_i1_3	583	594	yes	no	2	0.00015241	130.56	23757000
ILFEVIQK	EDFVRYRKILFEVIQK	ILFEVIQKIEGKKCCV	8	0	988.596	>c29357_g1_i1_2	>c29357_g1_i1_2	163	170	yes	yes	2	0.021286	116.73	454940000
INVYYNEATGGK	DSDLQLERINVYYNEA	YNEATGGKYVPRAVLV	12	0	1327.64	>c40975_g3_i1_1	>c40975_g3_i1_1	76	87	yes	yes	2	0.021506	94.122	25408000
IQDKEGIPPDQQR	TIENVKAKIQDKEGIP	GIPPDQQRLIFAGKQL	13	1	1522.77	>c54677_g1_i1_2;>c28941_g1_i1_1;>c41646_g5_i1_1;>c82799_g1_i1_4;>c89657_g1_i1_2;>c41646_g6_i1_1;>c21197_g1_i1_6;>c39900_g2_i3_3;>c39900_g2_i1_3;>c28941_g1_i2_3;>c28941_g1_i3_3;>c39660_g1_i1_1;>c39660_g1_i2_2	>c54677_g1_i1_2	65	77	yes	no	2;3	0.00024794	123.29	236560000
ISEQFTAMFR	AVQELFKRISEQFTAM	EQFTAMFRRKAFLHWY	10	0	1228.59	>c40975_g4_i2_1;>c40975_g4_i1_1;>c22430_g1_i1_3;>c53194_g1_i1_6	>c40975_g4_i2_1	212	221	yes	no	2	3.2873e-10	160.75	84412000		39
ISGLIYEETR	ARRGGVKRISGLIYEE	GLIYEETRGVLKVFLE	10	0	1179.61	>c41117_g3_i2_4;>c41117_g3_i3_5;>c41117_g3_i1_5;>c41117_g3_i4_6	>c41117_g3_i2_4	71	80	yes	no	2	2.0307e-16	180.07	188970000
ITATSSQANAQDAVQK	GIGNFPIKITATSSQA	NAQDAVQKLLFVKPGC	16	0	1631.81	>c41889_g3_i8_5;>c41889_g3_i4_5	>c41889_g3_i8_5	522	537	yes	no	2	6.2821e-85	244.36	13543000
ITNIVIVEVSSSDR	LCLEKLGKITNIVIVE	VEVSSSDRSATAPSDY	14	0	1530.83	>c31462_g1_i1_1	>c31462_g1_i1_1	29	42	yes	yes	2	1.0981e-13	153.23	22912000
ITVGLQNAIR	RYADITVKITVGLQNA	VGLQNAIRSGDSDPKF	10	0	1083.64	>c41584_g1_i8_4;>c41584_g1_i3_4	>c41584_g1_i8_4	217	226	yes	no	2	2.2077e-06	149.72	58751000
IWHHTFYNELR	TNWDDMEKIWHHTFYN	HTFYNELRVAPEEHPV	11	0	1514.74	>c41075_g1_i4_4;>c41075_g1_i2_4;>c18910_g1_i1_2;>c2468_g1_i1_1;>c39671_g2_i1_3;>c14026_g1_i1_3	>c41075_g1_i4_4	102	112	no	no	3	3.2102e-07	150.46	49801000
KDLYANTVLSGGTTMYPGIADR	MKCDVDIRKDLYANTV	MYPGIADRMQKEITAL	22	1	2342.16	>c21396_g1_i1_4	>c21396_g1_i1_4	27	48	yes	yes	3	7.6356e-34	165.32	69006000		7
KIEISQHAK	________________	IEISQHAKYTCSFCGK	9	1	1052.6	>c69881_g1_i1_5	>c69881_g1_i1_5	8	16	yes	yes	3	0.00013801	128.58	23610000
KILFEVIQK	NEDFVRYRKILFEVIQ	ILFEVIQKIEGKKCCV	9	1	1116.69	>c29357_g1_i1_2	>c29357_g1_i1_2	162	170	yes	yes	2	0.00064528	135.86	34534000
KPSAPPGVDCSIFNTLGSK	DDGGCCIRKPSAPPGV	IFNTLGSKRCNAVKQG	19	1	1973.99	>c33984_g1_i2_3;>c33984_g1_i1_1	>c33984_g1_i2_3	392	410	yes	no	3	5.8308e-05	99.409	20807000
KVDPSDGCCPICGGAVDVALDEK	RSHRNCEKKVDPSDGC	VDVALDEKGLGKYAQL	23	1	2461.09	>c32738_g1_i3_3;>c32738_g1_i1_3	>c32738_g1_i3_3	14	36	yes	no	3	0.00021266	82.302	7915800
LAVNMVPFPR	QLNADLRKLAVNMVPF	VNMVPFPRLHFFMPGF	10	0	1142.63	>c40975_g4_i2_1;>c40975_g4_i1_1;>c66174_g1_i1_2;>c38020_g1_i1_1;CON__ENSEMBL:ENSBTAP00000025008	>c40975_g4_i2_1	84	93	yes	no	2	0.00039008	123.86	127810000		40
LCYVALDFEQEMATAASSSSLEK	IVRDIKEKLCYVALDF	ASSSSLEKSYELPDGQ	23	0	2549.17	>c14026_g1_i1_3	>c14026_g1_i1_3	141	163	yes	yes	2;3	9.0904e-41	168.68	47782000		1
LDGDLVHSDR	DFCGLCGRLDGDLVHS	GDLVHSDRTTVAEITN	10	0	1125.54	>c32287_g1_i1_1	>c32287_g1_i1_1	88	97	yes	yes	2;3	6.8241e-05	133.89	487160000
LEEGLEQCR	HLQGFVSKLEEGLEQC	EEGLEQCRKVANTLDI	9	0	1132.52	>c31990_g1_i4_4;>c31990_g1_i1_4;>c31990_g1_i3_4	>c31990_g1_i4_4	461	469	yes	no	2	0.01547	99.815	13676000
LGVIADKIDTNK	SPAESERRLGVIADKI	ADKIDTNKDGIVTKDE	12	1	1285.72	>c40657_g1_i2_4;>c40657_g1_i1_4	>c40657_g1_i2_4	103	114	yes	no	2	0.008712	84.169	0
LHFFMPGFAPLTSR	VNMVPFPRLHFFMPGF	GFAPLTSRGSQQYRAL	14	0	1619.83	>c40975_g4_i2_1;>c40975_g4_i1_1;>c66174_g1_i1_2	>c40975_g4_i2_1	94	107	yes	no	2;3	0.00084572	109.95	66983000		41
LHFTLLEIK	NLYLNGERLHFTLLEI	HFTLLEIKARPPNCAE	9	0	1112.66	>c64227_g1_i1_3	>c64227_g1_i1_3	93	101	yes	yes	2;3	1.7225e-15	190.02	940250000
LIFAGKQLEDGR	________________	GKQLEDGRTLSDYNIQ	12	1	1345.74	>c54677_g1_i1_2;>c28941_g1_i1_1;>c41646_g5_i1_1;>c82799_g1_i1_4;>c89657_g1_i1_2;>c41646_g6_i1_1;>c21197_g1_i1_6;>c39900_g2_i3_3;>c39900_g2_i1_3;>c37205_g1_i1_6;>c31976_g1_i1_3;>c28941_g1_i2_3;>c28941_g1_i3_3;>c39900_g2_i2_3;>c39660_g1_i1_1;>c39660_g1_i2_2;>c39900_g2_i4_3;>c51508_g1_i1_1;>c1923_g1_i1_2	>c54677_g1_i1_2	2	13	yes	no	3	0.0034096	90.793	12712000
LIVTLSDLQVR	DLARIGVKLIVTLSDL	TLSDLQVRISSGALSG	11	0	1255.75	>c32287_g1_i1_1	>c32287_g1_i1_1	61	71	yes	yes	2	5.894e-41	219.5	1097600000
LKTALGIEELPRFDR	TEPGAGLKLKTALGIE	EELPRFDRDELARYFG	15	2	1756.98	>c67079_g1_i1_3	>c67079_g1_i1_3	30	44	yes	yes	3	0.0012953	83.877	0			40
LLDSNYDNDLSLPR	AAITPFNRLLDSNYDN	DNDLSLPRGWTRPLPS	14	0	1633.79	>c80614_g1_i1_3	>c80614_g1_i1_3	63	76	yes	yes	2	0.010457	77.42	0
LNSNTGGVTLER	ENTVFNGKLNSNTGGV	TGGVTLERNIFQFLTC	12	0	1259.65	>c99840_g1_i1_1	>c99840_g1_i1_1	194	205	yes	yes	2	3.7838e-21	184.31	973570000
LQNFLDGANR	LQDIELRRLQNFLDGA	NFLDGANRAREEQRKQ	10	0	1146.58	>c31990_g1_i4_4;>c31990_g1_i1_4;>c31990_g1_i3_4	>c31990_g1_i4_4	395	404	yes	no	2	1.2151e-06	150.81	161310000
LQTTIDIVR	VSPSLIHRLQTTIDIV	QTTIDIVRQKISQCCS	9	0	1057.61	>c40551_g1_i1_3	>c40551_g1_i1_3	54	62	yes	yes	2	0.0091021	111.61	141960000
LSALTPTAPAATGTR	AWMSREWRLSALTPTA	APAATGTRAVTTSWAP	15	0	1426.78	>c344_g1_i1_3	>c344_g1_i1_3	57	71	yes	yes	2	0.0014907	109	1081400000
LSLPLTLPPSNKK	IFSLIFRRLSLPLTLP	TLPPSNKKQIEHLDUN	13	1	1406.85	>c41697_g1_i5_6	>c41697_g1_i5_6	388	400	yes	yes	2	0.0017946	99.5	69648000	6;7		6;31
LSTLEGELR	RMDGFGERLSTLEGEL	STLEGELRTQAATLTE	9	0	1016.55	>c7640_g1_i1_5	>c7640_g1_i1_5	64	72	yes	yes	2	0.0023456	124.92	346940000
LTDEEVDEMIR	VMVNLGERLTDEEVDE	EEVDEMIREADVDGDG	11	0	1348.62	>c27518_g1_i1_4;>c95380_g1_i1_3;>c39900_g2_i3_4;>c39900_g2_i2_4;>c39900_g2_i1_4;>c39900_g2_i4_4	>c27518_g1_i1_4	137	147	yes	no	2	9.0618e-05	134.3	48686000		9
LTELMLGGLPTER	FNPAMVSRLTELMLGG	LGGLPTERLGFPLHSR	13	0	1428.76	>c66270_g1_i1_6	>c66270_g1_i1_6	13	25	yes	yes	2	1.8244e-08	151.98	401200000	8
LTIQNVVVEDSGVYR	NINRQGEKLTIQNVVV	VEDSGVYRCLAIGNDG	15	0	1690.89	>c95078_g1_i1_2	>c95078_g1_i1_2	76	90	yes	yes	2;3	9.2361e-36	200.55	334960000
LTIVDDDDVTVR	RGSPFRSRLTIVDDDD	DDDDVTVRFDKATDTV	12	0	1359.69	>c35050_g1_i1_1	>c35050_g1_i1_1	50	61	yes	yes	2	2.9114e-14	168.02	230860000
LVGGSSYNEGR	DSPGYNVRLVGGSSYN	GSSYNEGRVEVNYNGE	11	0	1137.54	>c36962_g2_i3_6;>c80079_g1_i1_2	>c36962_g2_i3_6	21	31	yes	no	2	0.00012322	137.89	170570000
MGEFYYR	LRTIEIFRMGEFYYRS	RMGEFYYRSGVNTLSD	7	0	964.411	>c41377_g2_i1_1;>c41377_g2_i3_1;>c41377_g2_i2_1	>c41377_g2_i2_1	241	247	no	no	2	0.030718	80.462	8869000
MIGVAGLK	MLAPSMDRMIGVAGLK	MIGVAGLKLCNGDTWK	8	0	787.463	>c37591_g1_i3_5	>c37591_g1_i3_5	225	232	yes	yes	2	0.03169	79.469	3275100000
MVEQFIQEGR	TLSEWRSRMVEQFIQE	EQFIQEGRGGYWVDEG	10	0	1235.6	>c39985_g1_i1_2	>c39985_g1_i1_2	378	387	yes	yes	2	0.00021567	127.83	216610000		30
NIGTLIIR	VNGINLKRNIGTLIIR	NIGTLIIRNVIDYSDV	8	0	898.56	>c99840_g1_i1_1	>c99840_g1_i1_1	128	135	yes	yes	2	0.029487	110.22	124460000
NLDIERPTYTNLNR	AIYDICRRNLDIERPT	PTYTNLNRLIGQIVSS	14	1	1717.87	>c41202_g1_i3_5	>c41202_g1_i3_5	257	270	no	no	3	0.0045673	82.651	75666000
NLGVLTAVNFNK	NLSSNTERNLGVLTAV	LTAVNFNKIDDHTILR	12	0	1288.71	>c38911_g1_i3_1	>c38911_g1_i3_1	18	29	yes	yes	2	1.4436e-34	208.56	258150000
NMITGTSQADCAVLIVAAGVGEFEAGISK	PGHRDFIKNMITGTSQ	EFEAGISKNGQTREHA	29	0	2908.43	>c35785_g1_i2_3;>c35785_g1_i1_3;>c35785_g1_i3_3;>c32626_g1_i1_4	>c32626_g1_i1_4	123	151	no	no	3	1.245e-55	174.89	199380000		17
NNFSDTGNFGFGIQEHIDLGIK	VREYELRKNNFSDTGN	EHIDLGIKYDPSIGIY	22	0	2422.16	>c102013_g1_i1_4	>c102013_g1_i1_4	53	74	yes	yes	3	1.0803e-15	132.83	15275000
NQVAMNPTNSIFDAK	RLIGDSAKNQVAMNPT	TNSIFDAKRLIGRKWD	15	0	1648.79	>c94913_g1_i1_1	>c94913_g1_i1_1	75	89	yes	yes	2	2.558e-20	169.4	137760000		51
NSLESYAFNMK	QRERISAKNSLESYAF	ESYAFNMKSTMEDEKV	11	0	1302.59	>c94913_g1_i1_1;>c64904_g1_i1_3;>c6913_g1_i1_1	>c94913_g1_i1_1	558	568	no	no	2	0.025095	73.435	7617400
NSSYFVEWIPNNVK	QMLNVQNKNSSYFVEW	EWIPNNVKTAVCDIPP	14	0	1695.83	>c40975_g4_i2_1;>c40975_g4_i1_1;>c22430_g1_i1_3;>c53194_g1_i1_6;>c40975_g2_i1_1;>c40975_g2_i3_1;>c40975_g2_i2_1	>c40975_g4_i2_1	168	181	yes	no	2	0.022991	69.261	0
NVLIFDLGGGTFDVSILTIEDGIFEVK	DKKVGVERNVLIFDLG	EDGIFEVKSTAGDTHL	27	0	2910.53	>c65284_g1_i1_4	>c65284_g1_i1_4	36	62	yes	yes	3	4.1443e-19	122.8	48186000
PAPSSWFRRATR	TTGSSTRRPAPSSWFR	SWFRRATRPTVRRCCA	12	2	1430.75	>c33816_g1_i1_5	>c33816_g1_i1_5	268	279	yes	yes	2;3	0.0019814	107.06	866590000			21
PGMVVTFAPVNVTTEVK	RVETGVIKPGMVVTFA	VNVTTEVKSVEMHHEA	17	0	1787.95	>c37486_g1_i1_5	>c37486_g1_i1_5	103	119	yes	yes	2	9.9003e-13	148.44	37524000		26
PGSDISPGLVPDGAK	RCKSYTTRPGSDISPG	GLVPDGAKCGNNMVCM	15	0	1408.72	>c40964_g7_i1_1;>c40964_g7_i2_1;>c40964_g7_i4_2;>c40964_g7_i8_1	>c40964_g7_i1_1	316	330	yes	no	2	6.5517e-09	140.19	119580000
QEDAENTEDAAAR	RGLTGNTRQEDAENTE	NTEDAAARLHESGIYD	13	0	1418.59	>c39819_g2_i1_4;>c39819_g2_i2_5	>c39819_g2_i1_4	349	361	yes	no	2	0.0036383	77.894	0
QEYDESGPSIVHR	FQQMWISKQEYDESGP	SGPSIVHRKCFURDRP	13	0	1515.7	>c21396_g1_i1_4;>c13368_g1_i1_6	>c21396_g1_i1_4	96	108	yes	no	2;3	5.3818e-31	195.71	567780000
QITACPSANSR	MNRRCVARQITACPSA	ACPSANSRECSGFGVC	11	0	1203.57	>c40964_g7_i1_1;>c40964_g7_i2_1;>c40964_g7_i4_2;>c40964_g7_i8_1	>c40964_g7_i1_1	346	356	yes	no	2	0.0039068	86.114	39244000
QLFHPEQLITGK	EVRTGTYRQLFHPEQL	PEQLITGKEDAANNYA	12	0	1409.77	>c41202_g1_i3_5	>c41202_g1_i3_5	126	137	no	no	2;3	3.465e-06	138.02	112550000
QLGFGSSGTAVR	TDAGVVCRQLGFGSSG	GSSGTAVRSAGFGQGS	12	0	1178.6	>c36962_g2_i2_6;>c36962_g2_i1_6	>c36962_g2_i2_6	54	65	yes	no	2	0.00018341	122.55	2609500000
QQEQYLLAK	ULANVKSRQQEQYLLA	QEQYLLAKASUVSHNG	9	0	1119.59	>c41686_g1_i1_4	>c41686_g1_i1_4	394	402	yes	yes	2	0.00010302	113.74	53226000
QSILNRTAAPCPDVQK	DSKWSYQRQSILNRTA	APCPDVQKDACCVKLA	16	1	1796.92	>c32382_g1_i1_6	>c32382_g1_i1_6	87	102	yes	yes	2	0.0004247	110.55	5511800000	3;4
QTAFEEPLDTK	VEEPLDTKQTAFEEPL	FEEPLDTKQTASELNV	11	0	1277.61	>c31990_g1_i4_4;>c31990_g1_i1_4;>c31990_g1_i3_4	>c31990_g1_i4_4	636	646	yes	no	2	0.0030643	102.97	31185000
QTQTFTTYSDNQPGVLIQVYEGER	RNTTIPTKQTQTFTTY	IQVYEGERAMTKDNNL	24	0	2773.32	>c6913_g1_i1_1	>c6913_g1_i1_1	63	86	yes	yes	3	7.2423e-11	103.35	20145000
QVHPDTGISSK	IYIYKVLKQVHPDTGI	PDTGISSKAMSIMNSF	11	0	1167.59	>c18914_g1_i1_1;>c41117_g1_i1_6	>c18914_g1_i1_1	52	62	yes	no	2;3	4.302e-33	203.51	1410800000
RETAQREMER	DIDAICPKRETAQREM	TAQREMERRIVSQLLS	10	2	1304.63	>c40022_g1_i7_2;>c40022_g1_i1_2;>c40022_g1_i11_2;>c40022_g1_i9_2;>c40022_g1_i3_2	>c40022_g1_i7_2	51	60	yes	no	3	0.00092955	93.178	0		31
RKPDTIEVQQMK	NHELYMRRRKPDTIEV	TIEVQQMKAQAREDKH	12	2	1471.78	>c35111_g1_i1_5	>c35111_g1_i1_5	326	337	yes	yes	3	5.2726e-06	136.93	62462000		21
SFEEYRHYK	________________	FEEYRHYKENVRVMKE	9	1	1257.58	>c41875_g1_i2_2;>c41875_g1_i7_2;>c41875_g1_i4_2	>c41875_g1_i2_2	1	9	yes	no	2	0.0010538	107.57	421440000			51;52
SFLACTAANVR	GNCGHNARSFLACTAA	ACTAANVRCGQLHCRN	11	0	1208.6	>c40964_g7_i1_1;>c40964_g7_i2_1;>c40964_g7_i4_2;>c40964_g7_i8_1;>c40964_g7_i7_1	>c40964_g7_i1_1	262	272	yes	no	2	8.4562e-14	167.09	348070000
SGETEDTFIADLVVGLCTGQIK	WGVMVSHRSGETEDTF	GLCTGQIKTGAPCRSE	22	0	2352.15	>c38115_g1_i1_5	>c38115_g1_i1_5	143	164	yes	yes	2;3	7.3354e-223	322.15	81643000
SGVNTVFDR	RMGEFYYRSGVNTVFD	GVNTVFDRNGDVLDII	9	0	993.488	>c41377_g2_i2_1	>c41377_g2_i2_1	248	256	yes	yes	2	0.0062115	117.7	65614000
SIVSPSLIHR	AGQRGDSRSIVSPSLI	VSPSLIHRLQTTIDIV	10	0	1107.64	>c40551_g1_i1_3	>c40551_g1_i1_3	44	53	yes	yes	2	0.0027316	117.7	5715900
SLDGVYVDGISITSGSPR	YTPVTTSRSLDGVYVD	SITSGSPRKHVWTYAV	18	0	1821.91	>c41693_g1_i1_5;>c41693_g1_i7_5;>c41693_g1_i3_6	>c41693_g1_i1_5	141	158	yes	no	2;3	7.1837e-41	191.35	215860000
SMNCLTSGGEMMGAELR	GEFWIGLRSMNCLTSG	EMMGAELRIDYHLASG	17	0	1842.77	>c1963_g1_i2_2	>c1963_g1_i2_2	21	37	yes	yes	2	7.5488e-18	161.61	247930000		3;4;5
SPAVVLDGSR	FTDGLNNKSPAVVLDG	AVVLDGSRGICVDNTS	10	0	999.535	>c3160_g1_i1_2;>c3160_g1_i2_2	>c3160_g1_i1_2	50	59	yes	no	2	0.002262	120.06	222080000
SPIEQNPNVNIGSTTNKPLR	QDLINGQRSPIEQNPN	STTNKPLRLAINTAQF	20	1	2178.14	>c40125_g1_i3_5;>c40125_g1_i4_6;>c40125_g1_i5_6	>c40125_g1_i3_5	313	332	yes	no	3	4.195e-29	173.56	26623000
SQIHDIVLVGGSTR	LRDAKLDKSQIHDIVL	VLVGGSTRIPKIQKLL	14	0	1480.8	>c65284_g1_i1_4	>c65284_g1_i1_4	171	184	yes	yes	2;3	0.0013747	103.13	39875000
STAGDTHLGGEDFDNR	EDGIFEVKSTAGDTHL	GGEDFDNRMVNHFVAE	16	0	1690.72	>c65284_g1_i1_4	>c65284_g1_i1_4	63	78	yes	yes	2;3	4.5923e-20	165.45	112630000
SVCVSPSENVVLR	MFTHKPRRSVCVSPSE	PSENVVLRCDVMATPT	13	0	1444.73	>c29680_g1_i2_1;>c29680_g1_i3_1;>c29680_g1_i1_1	>c29680_g1_i2_1	135	147	yes	no	2	8.0383e-06	138.89	96259000
SYELPDGQVITIGNER	ASSSNIEKSYELPDGQ	VITIGNERFRCPEALF	16	0	1789.88	>c41075_g1_i4_4;>c41075_g1_i2_4;>c41075_g1_i5_5;>c41075_g1_i1_4;>c41075_g1_i3_5;>c14026_g1_i1_3	>c41075_g1_i4_4	256	271	no	no	2;3	1.5768e-71	238.83	668720000
SYTTRPGSDISPGLVPDGAK	NEGVVRCKSYTTRPGS	GLVPDGAKCGNNMVCM	20	1	2017.01	>c40964_g7_i1_1;>c40964_g7_i2_1;>c40964_g7_i4_2;>c40964_g7_i8_1	>c40964_g7_i1_1	311	330	yes	no	3	6.4393e-10	126.02	315180000
TADIEAIEAQASR	NRTLDAGRTADIEAIE	AIEAQASRLETAWAAG	13	0	1373.68	>c41377_g2_i1_1	>c41377_g2_i1_1	166	178	yes	yes	2	6.0211e-10	154.86	242230000
TADVEAVEAQAMR	NRTLDPGRTADVEAVE	AVEAQAMRLETAWGVG	13	0	1389.66	>c41377_g2_i2_1	>c41377_g2_i2_1	166	178	yes	yes	2	3.413e-07	140.01	86921000		46
TGPPATNLAEVDEAK	IVRWLLKRTGPPATNL	LAEVDEAKKFSEAHDV	15	0	1511.75	>c36846_g1_i1_5	>c36846_g1_i1_5	155	169	yes	yes	2	2.3851e-20	175.43	109210000
TGTNIPEALDLLTDASR	FDVSELNRTGTNIPEA	DLLTDASRDGRLGIRE	17	0	1785.91	>c39819_g2_i1_4;>c39819_g2_i2_5	>c39819_g2_i1_4	12	28	yes	no	2	0.031492	79.88	14592000
TIDTTPSMVEILAPR	ESFGLDLKTIDTTPSM	MVEILAPRRAFGIIED	15	0	1642.86	>c53634_g1_i1_3	>c53634_g1_i1_3	40	54	yes	yes	2;3	1.1004e-20	169.04	2501700000		48
TIGGGDDSFNTFFSETGAGK	DGQMPSDKTIGGGDDS	FSETGAGKHVPRAVFV	20	0	2006.89	>c41202_g1_i3_5	>c41202_g1_i3_5	82	101	yes	yes	2;3	3.8627e-70	223.76	80414000
TITLEVEPSDTIENVK	FVKTLTGKTITLEVEP	SDTIENVKAKIQDKEG	16	0	1786.92	>c54677_g1_i1_2	>c54677_g1_i1_2	47	62	yes	no	2;3	1.2548e-70	228.19	2631400000
TITLEVEPSDTIENVKAK	FVKTLTGKTITLEVEP	TIENVKAKIQDKEGIP	18	1	1986.05	>c54677_g1_i1_2	>c54677_g1_i1_2	47	64	yes	no	3	2.9228e-24	168.69	61628000
TLSDYNIQK	GKQLEDGRTLSDYNIQ	LSDYNIQKESTLHLVL	9	0	1080.55	>c54677_g1_i1_2;>c28941_g1_i1_1;>c41646_g5_i1_1;>c82799_g1_i1_4;>c89657_g1_i1_2;>c41646_g6_i1_1;>c21197_g1_i1_6;>c39900_g2_i3_3;>c39900_g2_i1_3;>c37205_g1_i1_6;>c31976_g1_i1_3;>c39900_g2_i2_3;>c39900_g2_i4_3	>c54677_g1_i1_2	14	22	yes	no	2	1.3204e-05	140.83	926490000
TNEADLGTPENPAR	AIEKQLSKTNEADLGT	GTPENPARSCYDLKLE	14	0	1483.69	>c36461_g1_i1_1	>c36461_g1_i1_1	521	534	yes	yes	2	1.7294e-31	194.59	109450000
TSQDIQGNVLR	FILSVVAKTSQDIQGN	DIQGNVLRCQCSSNRT	11	0	1229.64	>c41377_g2_i1_1;>c41377_g2_i3_1;>c41377_g2_i2_1	>c41377_g2_i2_1	142	152	no	no	2	0.002604	106.16	28997000
TTGIVMDSGDGVTHTVPIYEGYALPHAILR	LSLYASGRTTGIVMDS	ALPHAILRLDLAGRDL	30	0	3182.61	>c14026_g1_i1_3	>c14026_g1_i1_3	73	102	yes	yes	4	1.5239e-89	213.05	432090000		2
TTIFSPEGR	MSRRYDTRTTIFSPEG	TIFSPEGRLYQIEYAM	9	0	1006.51	>c38191_g1_i1_4	>c38191_g1_i1_4	28	36	yes	yes	2	0.010316	108.57	28248000
TVCPDTSSSPPLMCK	EDPDICDKTVCPDTSS	SSPPLMCKFYDSPNPF	15	0	1678.74	>c33984_g1_i2_3;>c33984_g1_i1_3	>c33984_g1_i2_3	353	367	yes	yes	2	0.015846	74.789	3582300		19
TVTAMDVVYALK	YTEHAKRKTVTAMDVV	MDVVYALKRQGRTLYG	12	0	1309.7	>c41117_g3_i2_4;>c41117_g3_i3_5;>c41117_g3_i1_5;>c41117_g3_i4_6	>c41117_g3_i2_4	105	116	yes	no	2	0.0014005	105.03	187690000		44
VAPEEHPVLLTEAPLNPK	HTFYNELRVAPEEHPV	TEAPLNPKANREKMTQ	18	0	1953.06	>c41075_g1_i4_4;>c41075_g1_i2_4;>c18910_g1_i1_2;>c2468_g1_i1_1;>c14026_g1_i1_3	>c41075_g1_i4_4	113	130	no	no	2;3	4.4243e-52	212.92	1791400000
VAVLGASGGIGQPLSLLLK	TTAQCNVKVAVLGASG	QPLSLLLKQSPLVSEI	19	0	1792.08	>c39828_g1_i3_5;>c39828_g1_i1_6	>c39828_g1_i3_5	40	58	yes	no	2	3.8221e-07	115.57	0
VCAELFSTATK	DTWKSYVKVCAELFST	ELFSTATKSERVHSPR	11	0	1225.6	>c37591_g1_i3_5	>c37591_g1_i3_5	245	255	yes	yes	2	0.0010199	122.7	121890000
VCDNPAPLNGGADCEGSATDQR	GGQQIRTRVCDNPAPL	EGSATDQRSCNTDPCT	22	0	2302.95	>c40964_g7_i1_1;>c40964_g7_i2_1;>c40964_g7_i4_2	>c40964_g7_i1_1	649	670	yes	no	2;3	1.887e-42	188.24	46072000
VEIATLTR	STKLNSTKVEIATLTR	VEIATLTRIGEGTDAR	8	0	901.523	>c38191_g1_i1_4	>c38191_g1_i1_4	246	253	yes	yes	2	0.030693	109.11	24561000
VEIIANDQGNR	VGVFQYGKVEIIANDQ	IANDQGNRTTPSYVAF	11	0	1227.62	>c94913_g1_i1_1	>c94913_g1_i1_1	44	54	yes	yes	2	7.175e-09	155	454980000
VETGVIKPGMVVTFAPVNVTTEVK	IGTVPVGRVETGVIKP	VNVTTEVKSVEMHHEA	24	1	2514.38	>c37486_g1_i1_5	>c37486_g1_i1_5	96	119	yes	yes	3	1.2673e-25	147.45	395720000		26
VFDKDGNGYISAAELR	EEIREAFRVFDKDGNG	YISAAELRHVMTNLGE	16	1	1753.86	>c103979_g1_i1_6	>c103979_g1_i1_6	99	114	yes	yes	2;3	7.4714e-10	136.26	45794000
VFLENVIR	EETRGVLKVFLENVIR	VFLENVIRDAVTYTEH	8	0	988.571	>c41117_g3_i2_4;>c41117_g3_i3_5;>c41117_g3_i1_5;>c41117_g3_i4_6	>c41117_g3_i2_4	85	92	yes	no	2	0.00022466	151.29	599550000
VFLPGGPQIR	NLYTEDCRVFLPGGPQ	LPGGPQIRGRAALNIT	10	0	1082.62	>c41377_g2_i1_1	>c41377_g2_i1_1	201	210	yes	yes	2	0.013666	83.948	0
VGGTAAVYTAAILEYLTAEVLELAGNASK	NRTTRHGRVGGTAAVY	ELAGNASKDLKVKRIS	29	0	2894.53	>c20021_g1_i1_2	>c20021_g1_i1_2	27	55	yes	yes	3	2.588e-102	220.69	59483000
VGINYQPPTVVPGGDLAK	DWCPTGFKVGINYQPP	VPGGDLAKVQRAVCML	18	0	1823.98	>c41202_g1_i3_5	>c41202_g1_i3_5	394	411	no	no	2	0.0034191	90.385	60982000
VGVFTFSTGAR	________________	FTFSTGAREDFDLDRH	11	0	1140.59	>c100960_g1_i1_4	>c100960_g1_i1_4	4	14	yes	yes	2	0.0012824	117.25	76884000
VIQTDDELLGVNR	PVGIAKPRVIQTDDEL	DELLGVNRVVFDNVIM	13	0	1470.77	>c41884_g1_i6_4;>c41884_g1_i2_4;>c41884_g1_i1_6	>c41884_g1_i6_4	271	283	yes	no	2	1.1705e-06	141.37	23697000
VNVSFGEESAQPGDDIAIK	VECELKEKVNVSFGEE	PGDDIAIKTTADVDTP	19	0	1974.95	>c41889_g3_i8_5;>c41889_g3_i4_5	>c41889_g3_i8_5	227	245	yes	no	2	0.0019389	91.64	0
VPAVFLDALR	FVLKQPIRVPAVFLDA	AVFLDALRSTVRGIDG	10	0	1099.64	>c7761_g1_i1_1	>c7761_g1_i1_1	121	130	yes	yes	2	2.3691e-21	200.11	31007000000
VPAVFLDALRSTVR	FVLKQPIRVPAVFLDA	DALRSTVRGIDGKVLR	14	1	1542.89	>c7761_g1_i1_1	>c7761_g1_i1_1	121	134	yes	yes	2;3	0.00014081	116.19	347290000
VPDEFSNINNR	ESLTLNLRVPDEFSNI	EFSNINNRLLIKEGSN	11	0	1303.62	>c38723_g1_i1_3	>c38723_g1_i1_3	207	217	yes	yes	2;3	8.876e-09	152.69	2087300000
VPQQCPSDPIVSLR	DSCTCQAKVPQQCPSD	SDPIVSLRRVRDCCCK	14	0	1594.81	>c37591_g1_i3_5	>c37591_g1_i3_5	304	317	yes	yes	2	7.8825e-17	173.06	184800000
VRPDLVPVLDR	DLVIHCDRVRPDLVPV	DLVPVLDRFQRSLRSY	11	1	1277.75	>c41731_g1_i13_5	>c41731_g1_i13_5	312	322	yes	yes	2	9.9742e-08	149.69	255370000
VSATFADSSIVNR	QFCKDKFKVSATFADS	ADSSIVNRLKRVYGKD	13	0	1365.69	>c41264_g1_i4_5;>c41264_g1_i1_4	>c41264_g1_i4_5	394	406	yes	no	2	0.028776	70.889	0
VSNIADGALVPLSR	IALAPVARVSNIADGA	GALVPLSRLVFNRAAI	14	0	1410.78	>c41727_g3_i2_1;>c41727_g3_i3_1;>c41727_g3_i1_1	>c41727_g3_i2_1	221	234	yes	no	2	0.0013911	113.52	68884000
VTTNDPSQPSIDVCR	DCPTGWTKVTTNDPSQ	QPSIDVCRSPNNNAGC	15	0	1687.78	>c41299_g2_i1_6	>c41299_g2_i1_6	139	153	yes	yes	2	0.00027555	109.07	0
VTVSNQINSGSR	SSLTQSTRVTVSNQIN	NQINSGSRLTRMITFS	12	0	1260.64	>c35925_g1_i3_2	>c35925_g1_i3_2	247	258	yes	yes	2	1.9237e-34	206.36	56737000
VTVSSPAWPR	EGCTWKSRVTVSSPAW	VSSPAWPRLMESQRYU	10	0	1098.58	>c29401_g1_i2_3;>c29401_g1_i1_2	>c29401_g1_i2_3	101	110	yes	no	2	7.1891e-06	143.7	37600000	1;2		1
VVEQLIEDR	TLKESDARVVEQLIED	VEQLIEDRALLQLFIE	9	0	1099.59	>c41884_g1_i6_4;>c41884_g1_i2_4;>c41884_g1_i1_6	>c41884_g1_i6_4	222	230	yes	no	2	0.0072373	115.78	65848000
VVHQVSPNVFTYPVIIK	RCEDGPIKVVHQVSPN	FTYPVIIKTTCNHLYC	17	0	1939.09	>c33984_g1_i2_3;>c33984_g1_i1_3	>c33984_g1_i2_3	75	91	yes	no	3	0.026456	66.022	17951000
WQSTPNIPIR	________________	STPNIPIRATSCRPEM	10	0	1210.65	>c22200_g1_i1_4	>c22200_g1_i1_4	1	10	yes	yes	2	0.00065361	105.52	421350000			0;19
YAQLFHEVQTLDGLLER	LDEKGLGKYAQLFHEV	TLDGLLERIVTSGTIP	17	0	2031.04	>c32738_g1_i3_3;>c32738_g1_i1_3	>c32738_g1_i3_3	41	57	yes	no	3	4.5739e-52	211.29	35620000
YRPGTVALR	GGVKKPHRYRPGTVAL	RPGTVALREIRRYQKS	9	1	1031.59	>c27354_g1_i1_6;>c34006_g1_i2_6;>c34006_g1_i1_6	>c27354_g1_i1_6	50	58	yes	no	2;3	0.0022761	109.88	392050000
YTSMANPVAGNIISAIGVTAIDR	TCTSVNARYTSMANPV	IGVTAIDRNRFCHDIE	23	0	2333.2	>c32287_g1_i1_1	>c32287_g1_i1_1	190	212	yes	yes	2;3	1.0564e-112	247.64	152830000		15
YYVTIIDAPGHR	LWKFETSKYYVTIIDA	IIDAPGHRDFIKNMIT	12	0	1403.72	>c32626_g1_i1_4	>c32626_g1_i1_4	60	71	yes	yes	2;3	0.00012355	132.32	65409000
